# Supplementary material for: Facet-Modulated Ferroelectric Polymers
Source: Research Square preprint supplement (doi:10.21203/rs.3.rs-7742625/v1), 2025-10-21
Supplement: Supplementary file 1 [file daef4ecd3c303fa8197f2806.docx]

**Facet-Modulated Ferroelectric Polymers**

**Bo Cai1,2, Zhi-Ling Hou3, Yuan-Yuan Qi1,2, Pei-Yan Zhao1,2, Hua-Long Peng1,2, Yu Zhang1,2, Martin C. Koo1,2, Tongcai Yue5, Pengfei Hu4*, Li-Min Liu5* and Guang-Sheng Wang1,2***

**1 School of Chemistry, Beihang University, Beijing 100191, China**

**2 State Key Laboratory of Bioinspired Interfacial Materials Science, Bioinspired Science Innovation Center, Hangzhou International Innovation Institute, Beihang University, Hangzhou 311115, China**

**3 School of Physics and Optoelectronic Engineering, Beijing University of Technology, Beijing, 100124, China**

**4 Research Institute of Aero-Engine, Beihang University, Beijing 100191, China**

**5 School of Physics, Beihang University, Beijing 100191, China**

**Email:** [**wanggsh@buaa.edu.cn**](mailto:guolin@buaa.edu.cn)**,** [**hupengfei@buaa.edu.cn**](mailto:xduan@chem.ucla.edu)**, liminliu@buaa.edu.cn**

This PDF file includes:

Supplementary Figures 1-35;

Supplementary Table S1, S2;

References 54-60

**Electromagnetic Wave Loss Measurement**

**The relaxation time τ**

According to Debye relaxation theory, the relaxation time can be derived from the following equation11:

(1)

Where is the frequency at which the dielectric loss peak occurs.

**0.05MHz-100 MHz range**

The capacitance (Cp) and loss angle tangent (D) values were measured in the 0.05 MHz-100 MHz range with contact electrode method by Impedance Analyzer (Agilent 4294A, America).

**The complex permittivity and** **dissipation factor:** The complex permittivity can be calculated by the following formula11:

(2)

(3)

The dissipation factor can be calculated by the following formula:

(4)

Where is the real part of the complex permittivity, is the imaginary part of the complex permittivity, refers to the thickness of the simples, *S* presents the area of electrodes, is the vacuum permittivity (8.85×10-12 F·m-1), is the dissipation factor.

**2-18 GHz range**

The complex permittivity and permeability values were measured in the 2-18 GHz range with the coaxial wire method by Vector Network Analyzer (VNA, ZNA43, ROHDE&SCHWARZ, Germany).

[**Reflection Loss**](javascript:;) **calculations:** [Reflection Loss](javascript:;) is an important index to evaluate the EMWA properties. According to the transmission line theory, the *RL* value can be calculated by the following formula54:

(5)

(6)

Where *εr* is the complex permittivity, *μr* is the complex permeability, *d* refers to the thickness of the coating, *f* presents the frequency of the electromagnetic wave, *c* is the velocity of light in free space (3×108 m·s-1), *Zin* is the normalized input impedance, respectively.

**Polarization loss and conduction loss:** The Polarization loss and conduction loss value can be calculated by the following formula55:

(7)

(8)

(9)

Where the , , , are the static permittivity, the relative permittivity at high frequency limit, the electric conductivity, the relaxation time, respectively.

**dielectric loss tangent:** tanδ is a core parameter for quantifying the dielectric loss capability of materials, whose definition and physical significance are as follows:

(10)

Where is the real part of the complex permittivity, is the imaginary part of the complex permittivity.

**Impedance matching calculations:**  is used to study the impedance matching characteristics, which can be calculated by the following formula56:


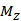


(11)

Where represents the real normalized input impedance, when , the ideal impedance matching will be realized, indicating that, under the given conditions, the electromagnetic wave can entrance into the material to the greatest extent possible, which is more conducive to the material's absorption and loss of the electromagnetic wave.


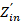

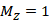


**The attenuation constant (*α*) calculations:** The attenuation constant estimates the combined loss capacity of incident electromagnetic waves and represents the EWMA attenuation characteristics of the material, which is determined by the following formula57:

(12)

**0.2-2.0 THz range**

Transmission properties were investigated by a terahertz time-domain spectrometer system (TPF 15K, Terahertz Photonics, China). In order to exclude the effects of mechanical vibration and air humidity, we performed the terahertz tests on a smooth optical platform in vacuum. All test specimens were precision cut with a cut size of 2 × 2 cm and placed on a specimen holder with a hollow circular hole with a diameter of 12 mm. The effective frequency range is 0.2-2.0 terahertz.

**The total THz shielding effectiveness (SET), the THz transmission (T) coefficients and shielding efficiency ()**: The THz transmission (T) coefficients and SET are obtained through fast Fourier transform (FFT) calculation by following equations58:

(13)

(14)

Where the , are the signal electric intensity of transmission and corresponding reference, respectively.

The correlation between shielding efficiency () and shielding effectiveness is quantified through as follows:

(15)

**The extinction Coefficient (κ), Absorption Coefficient (αT) and the complex permittivity:** The extinction Coefficient and Absorption Coefficient are obtained through fast Fourier transform (FFT) calculation by the following equations36:

(16)

(17)

(18)

(19)

Where is the film thickness, is the vacuum speed of light, is the angular frequency, is the phase difference between the sample signal and reference signal.

The complex dielectric constant of the sample is determined jointly by its refractive index and extinction coefficient:

(20)

(21)


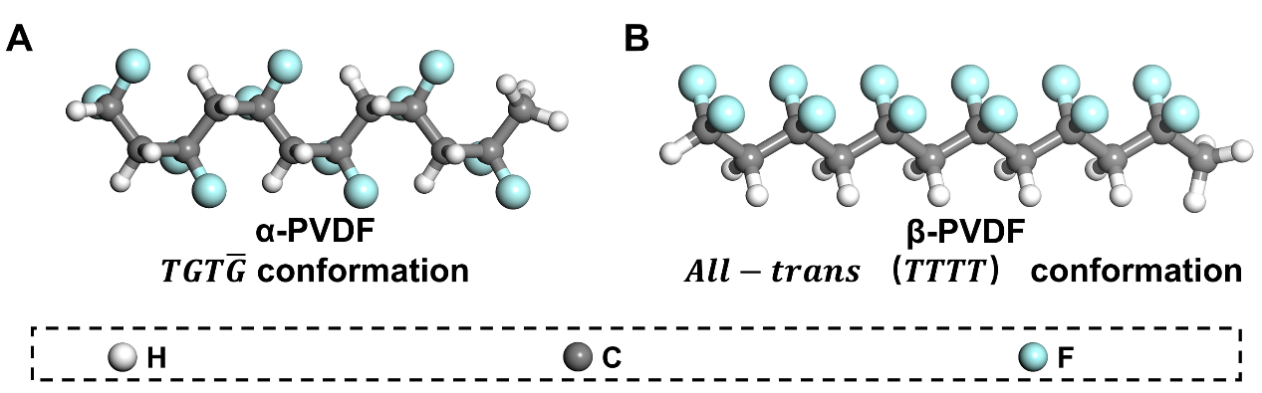


**Figure S1.** Schematic structure of **A**, α-phase PVDF, **B**, β-phase PVDF


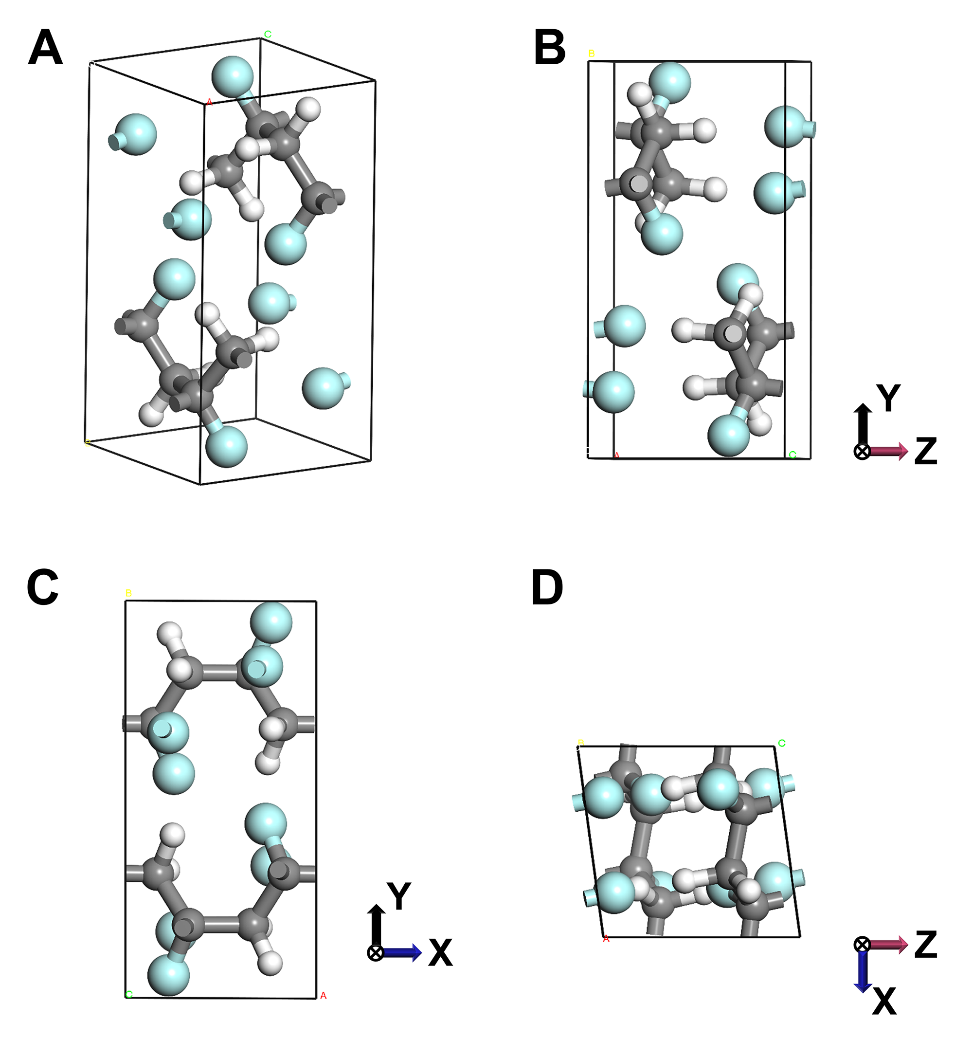


**Figure S2. A,** Three-dimensional and **B-D,** three-view diagrams of the cell structure of α-PVDF.


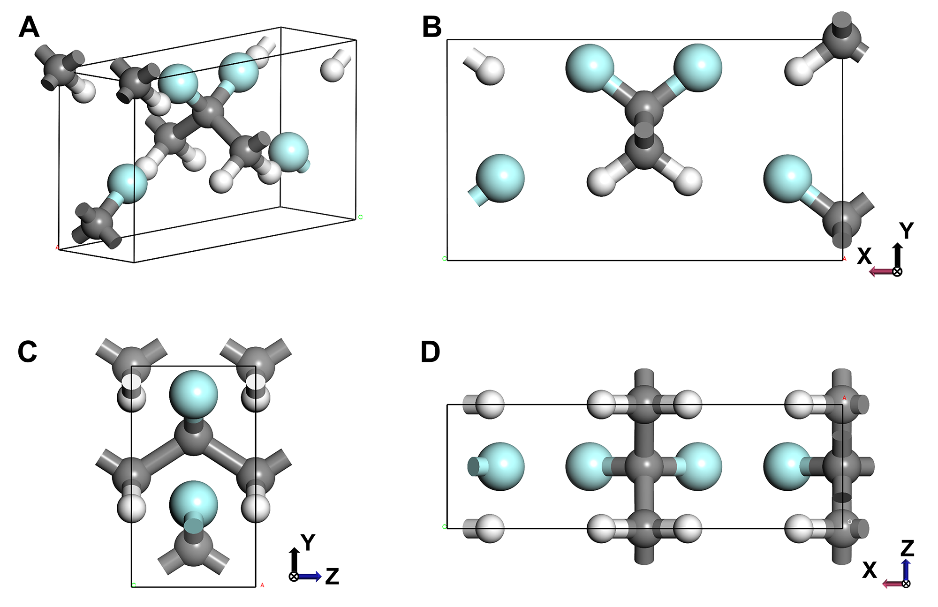


**Figure S3. A,** Three-dimensional and **B-D,** three-view diagrams of the cell structure of β-PVDF.


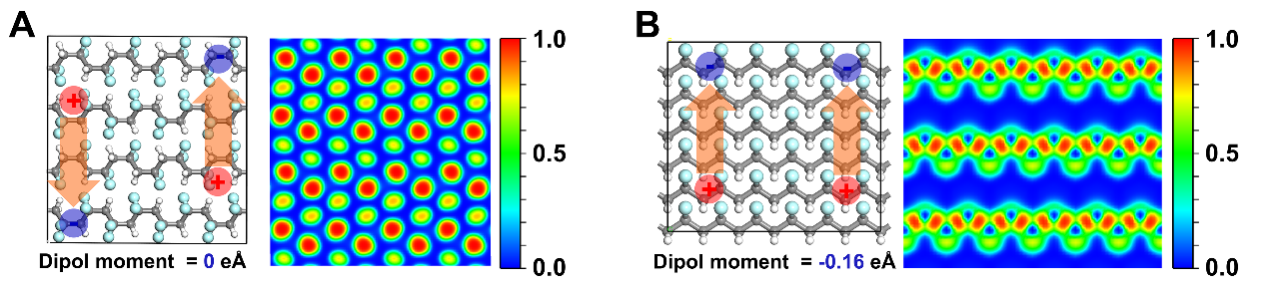


**Figure S4.** Schematic structure of **A,** α-phase PVDF and **B,** β-phase PVDF with electron localization function and dipole moment.


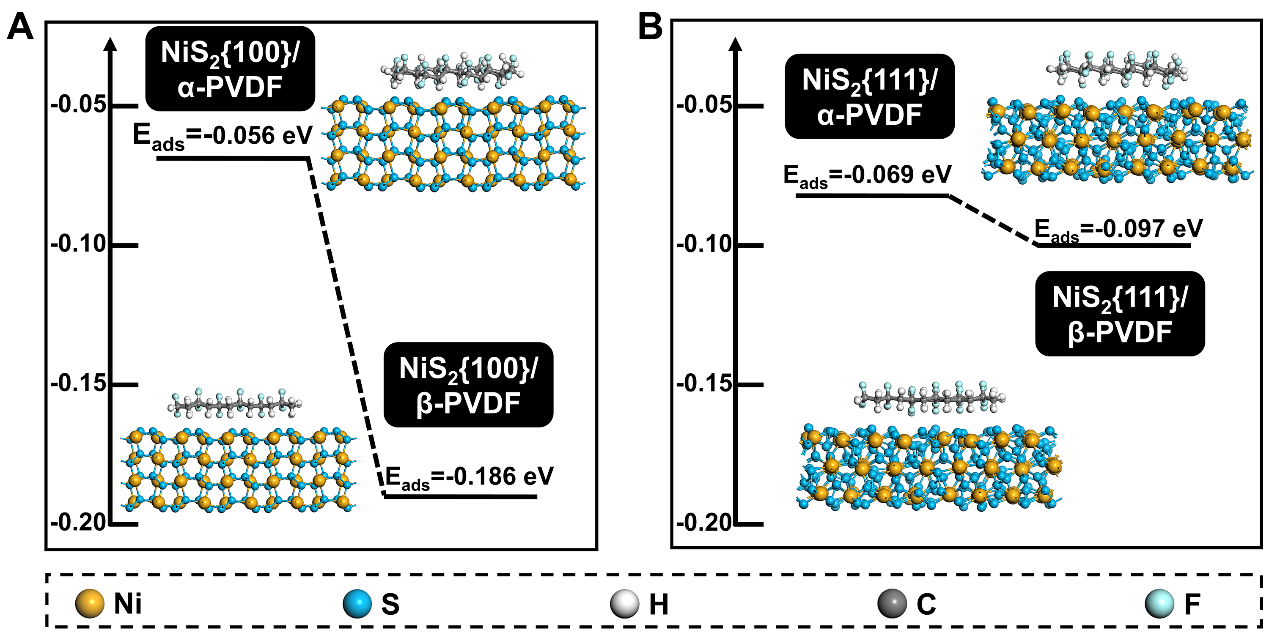


**Figure S5. A**, Comparison of adsorption energy on NiS2{100} for different PVDF phases. **B**, Comparison of adsorption energy on NiS2{111} for different PVDF phases.


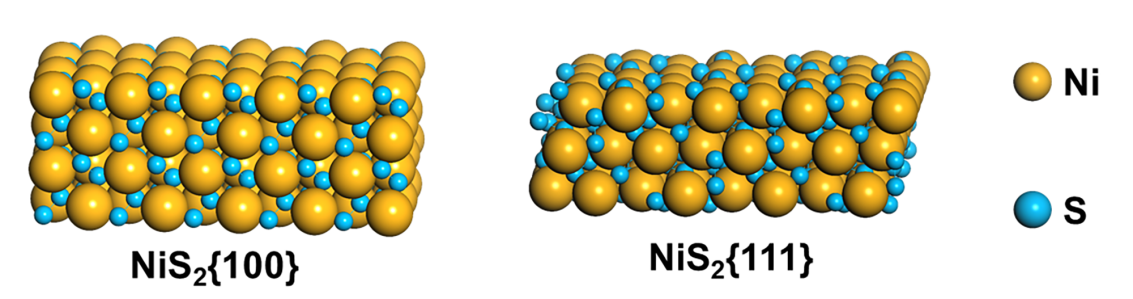


**Figure S6.** Schematic structure of NiS2{100} and NiS2{111}.


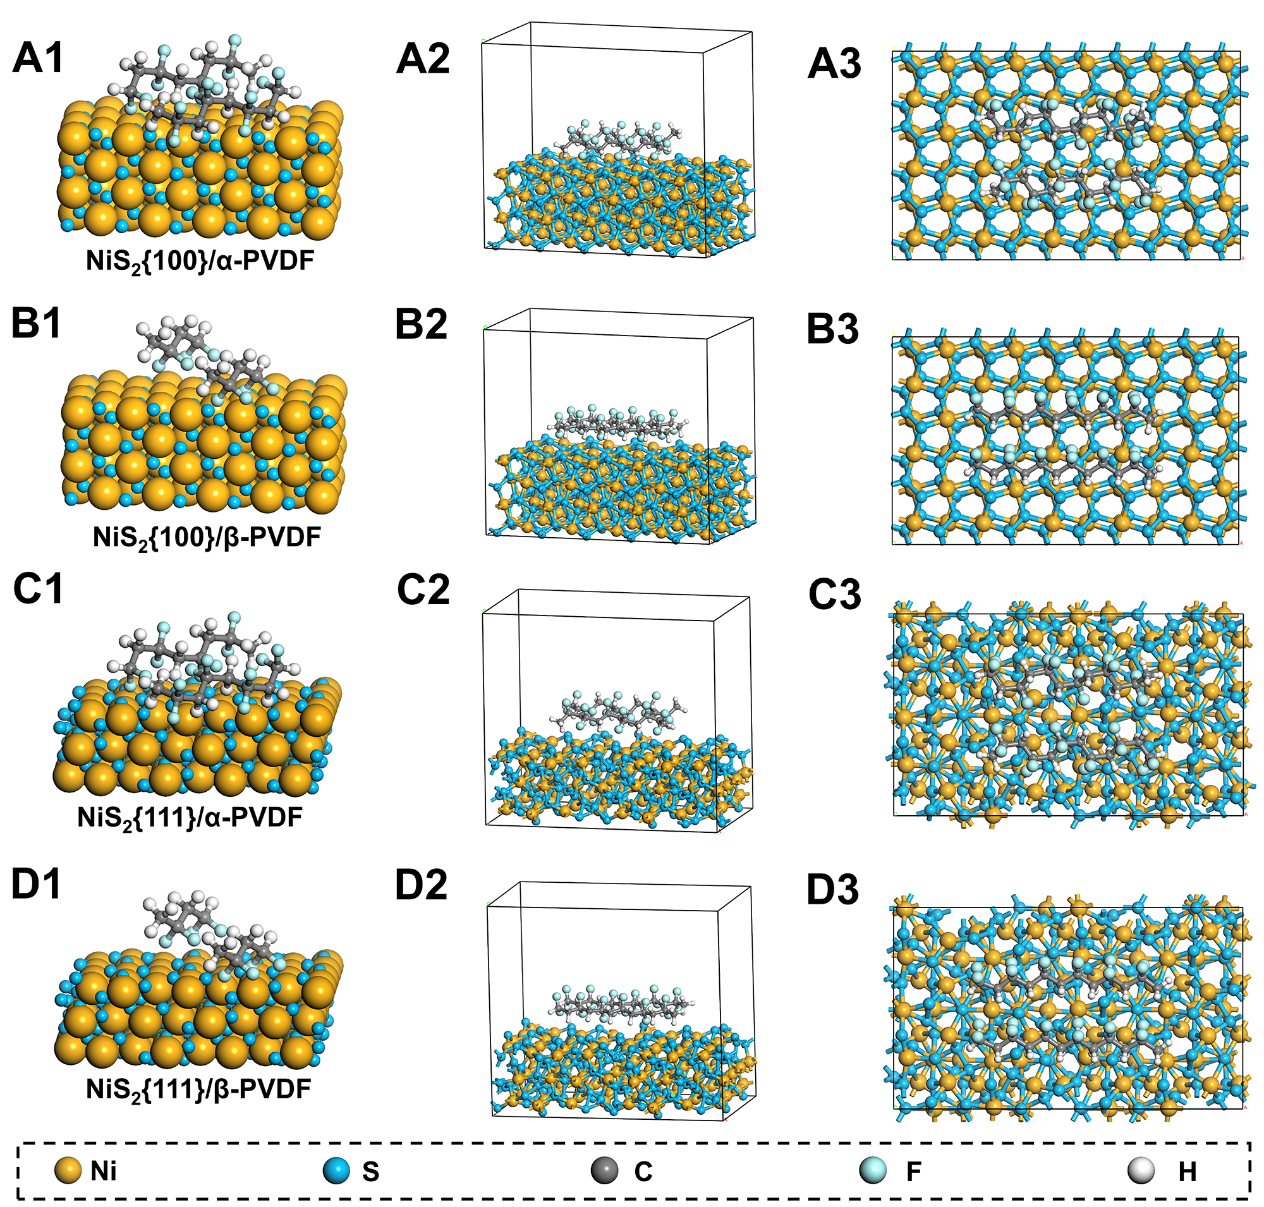


**Figure S7.** Schematic and optimized structure of **A1-A3,** NiS2{100}/α-PVDF, **B1-B3,** NiS2{100}/β- PVDF, **C1-C3,** NiS2{111}/α-PVDF and **D1-D3,** NiS2{111}/β-PVDF.


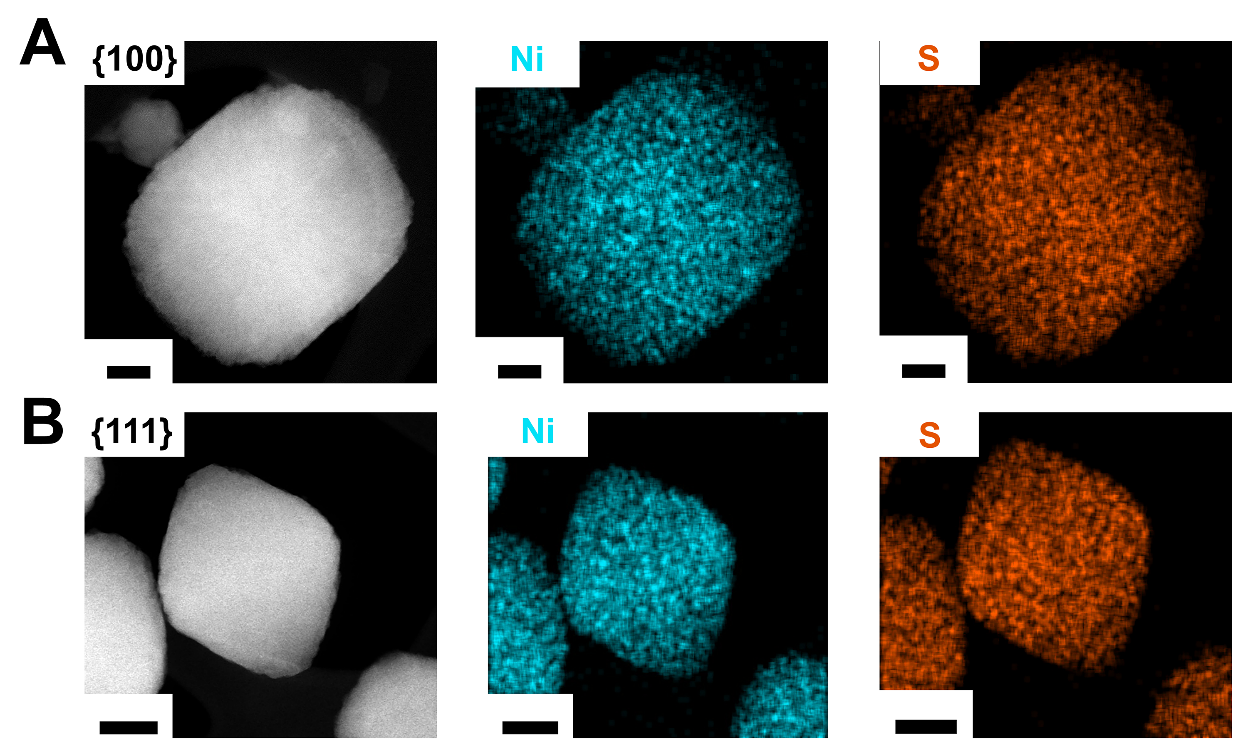


**Figure S8.** The Energy dispersive x-ray spectrograms (EDS) elemental mapping images of **A**, NiS2{100} **B,** and NiS2{111}. Scale bars are as follows: 50 nm (A), 100 nm (B).


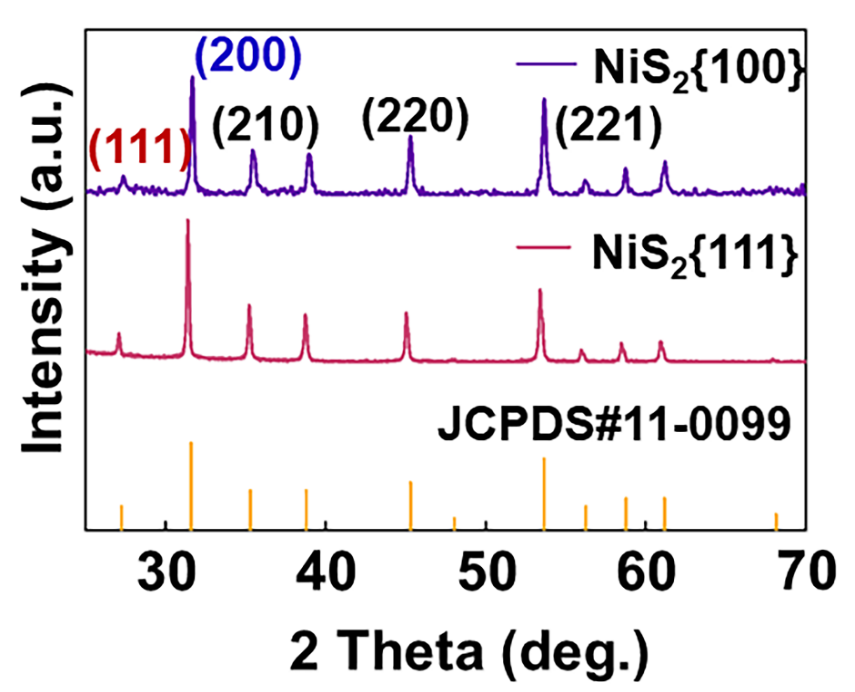


**Figure S9.** X-ray diffraction spectra of NiS2.

The XRD spectra shows that distinctive characteristic peaks can be observed on both crystal facets. Comparison with a reference standard spectrum (JCPDS#11-0099) confirms that the phase purity of the sample is good. In particular, NiS2 (I(111)/ I(200)=0.32) for the {111} facet exhibits a higher diffraction intensity ratio of the (111) to (200) facets compared to NiS2 (I(111)/ I(200)=0.28) for the {100} facet, suggesting a stronger {111} facet orientation.


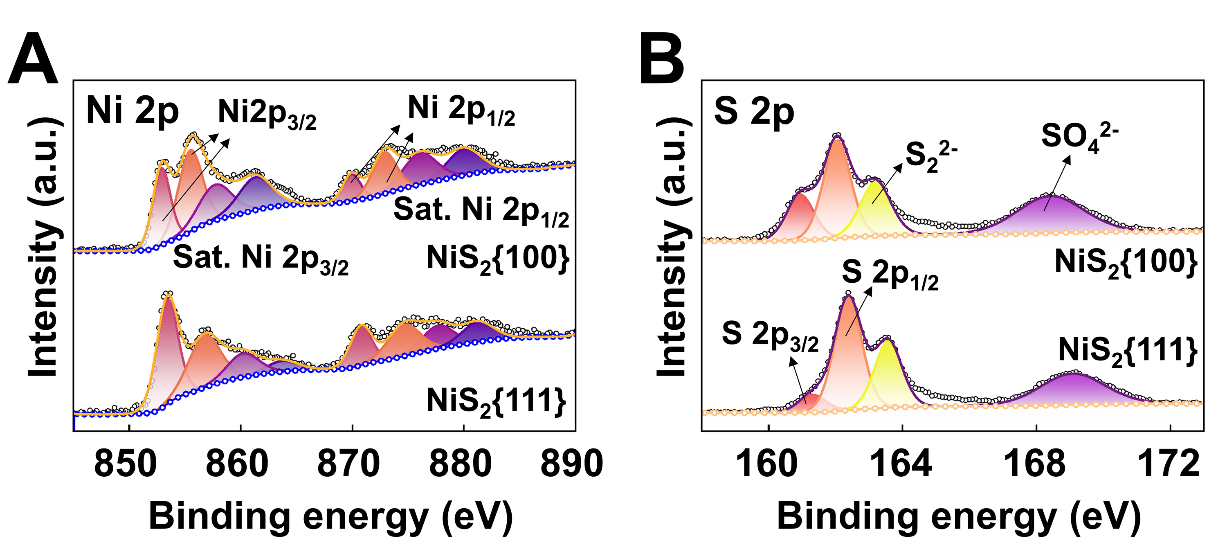


**Figure S10.** The XPS spectra of elemental **A**, Ni and **B**, S.


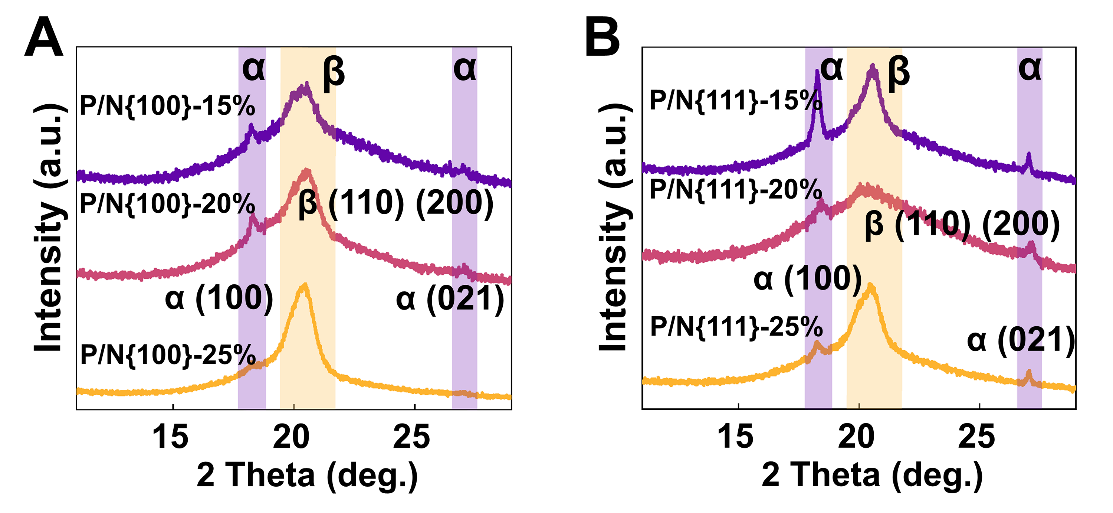


**Figure S11.** The X-ray diffraction spectra of **A,** P/N{100} and **B,** P/N{111}.


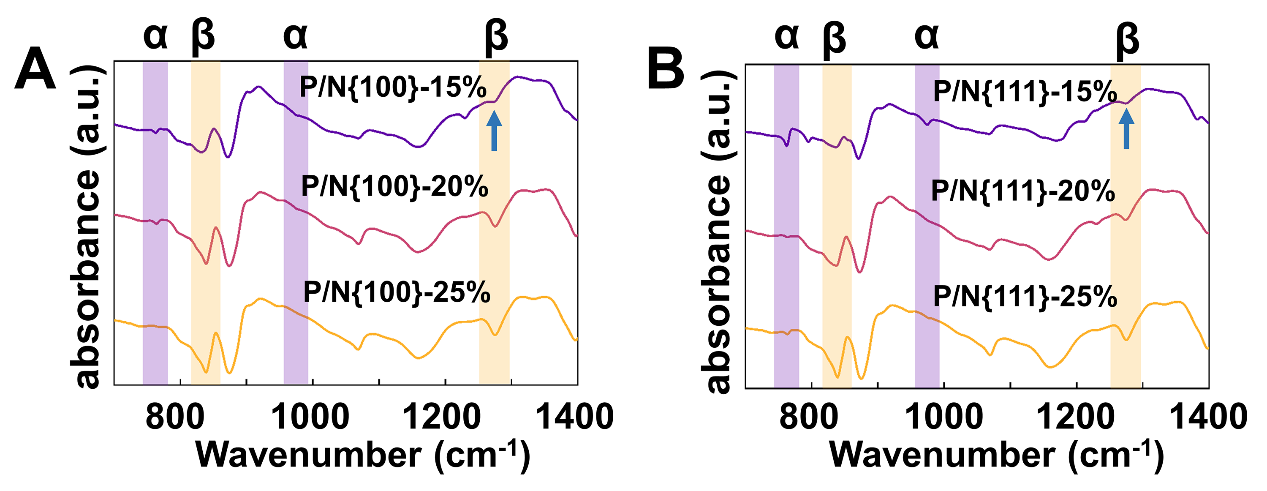


**Figure S12.** The FTIR absorption of **A,** P/N{100} and **B,** P/N{111}.

The α phase of PVDF is most easily detected by FTIR absorption as it presents a large number of characteristic bands, such as the absorption bands at 766, 855 and 976 cm-1. The IR absorption at the range of 840 cm-1 versus 1280 cm-1 applies only to the β-phase. The FTIR results are also commonly used to quantify the β-phase content of PVDF, the β-phase content can be calculated by the Beer-Lambert law23:

(22)

where and are absorbance at wavenumber 766 and 841 cm-1; and represent the absorption coefficients at corresponding wave numbers of each crystal phase, which are 6.1×104 and 7.7×104 cm2∙mol-1, respectively. The results reveal that the β-phase content in P/N{100} composites increases with higher NiS2 loading, reaching 49.62% at 15 wt.%, 60.67% at 20 wt.%, and 63.66% at 25 wt.%. In comparison, the P/N{111} composites exhibit slightly lower β-phase levels, with values of 47.16% at 15 wt.%, 54.06% at 20 wt.%, and 60.28% at 25 wt.%. These findings underscore the influence of crystal facets on the phase transition behavior of PVDF, with the {100} facet demonstrating a more pronounced enhancement of the β-phase compared to the {111} facet. This trend highlights the importance of facet engineering in optimizing the electroactive properties of PVDF-based composites.


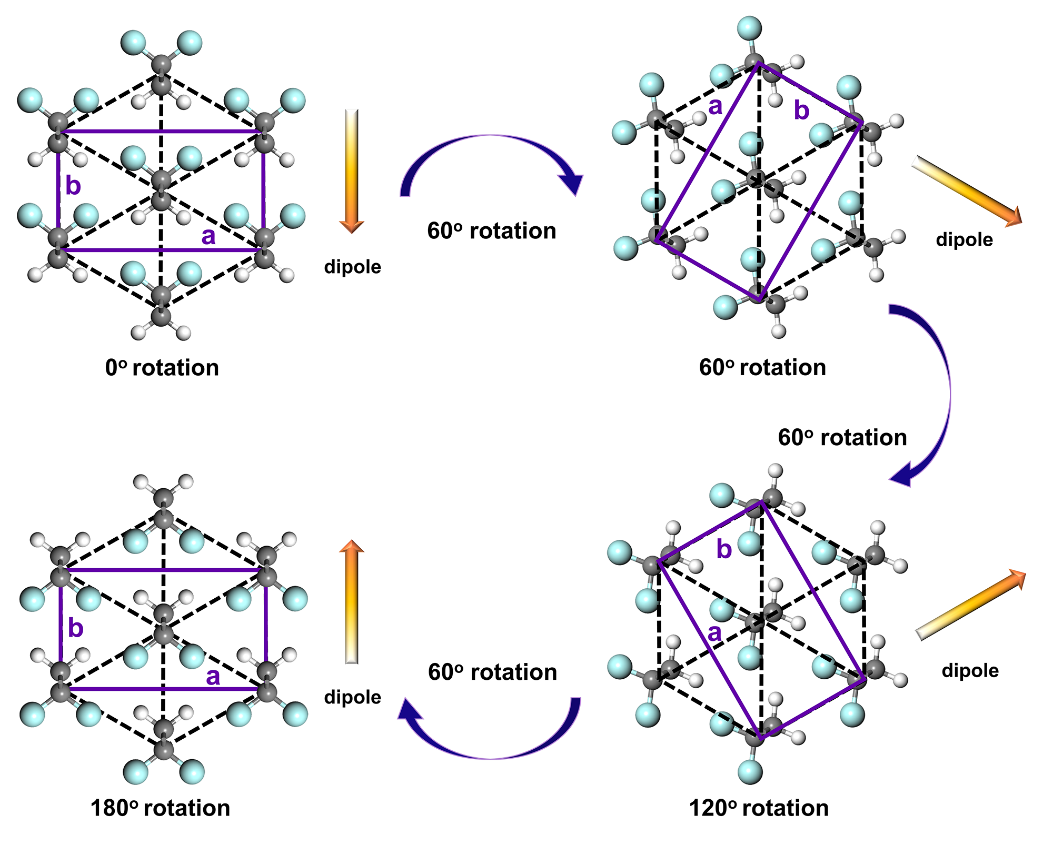


**Figure S13.** Schematic of dipole changes in the ferroelectric domain switching in PVDF ferroelectric phase.


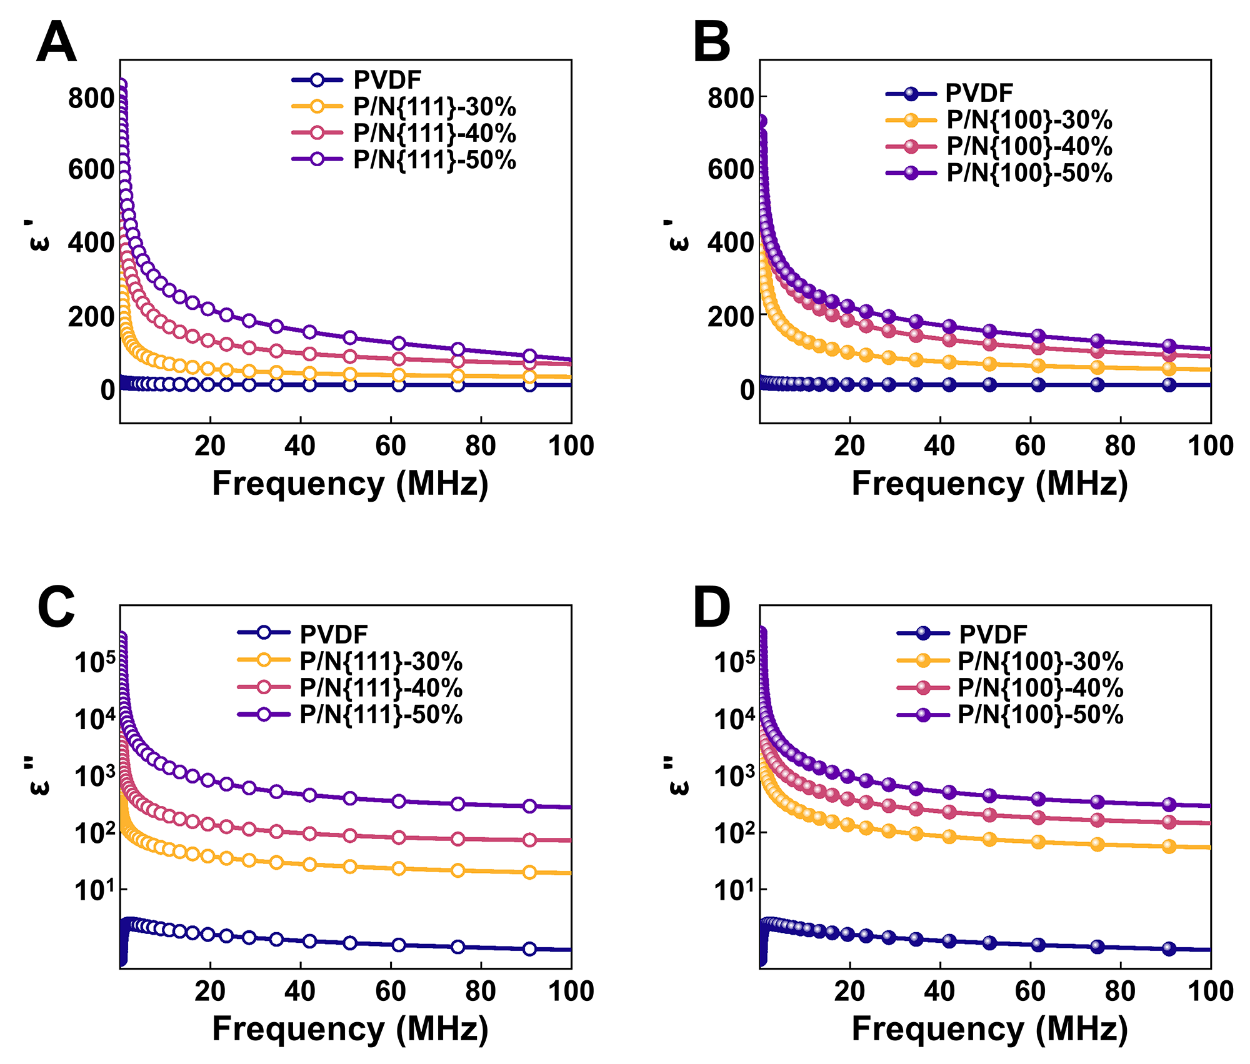


**Figure S14.** Real part of permittivity of **A,** P/N{111} and **B,** P/N{100} composites at EMWs from 50 kHz to 100 MHz. Imaginary part of permittivity of **C,** P/N{111} and **D,** P/N{100} composites at EMWs from 0.05 MHz to 100 MHz.


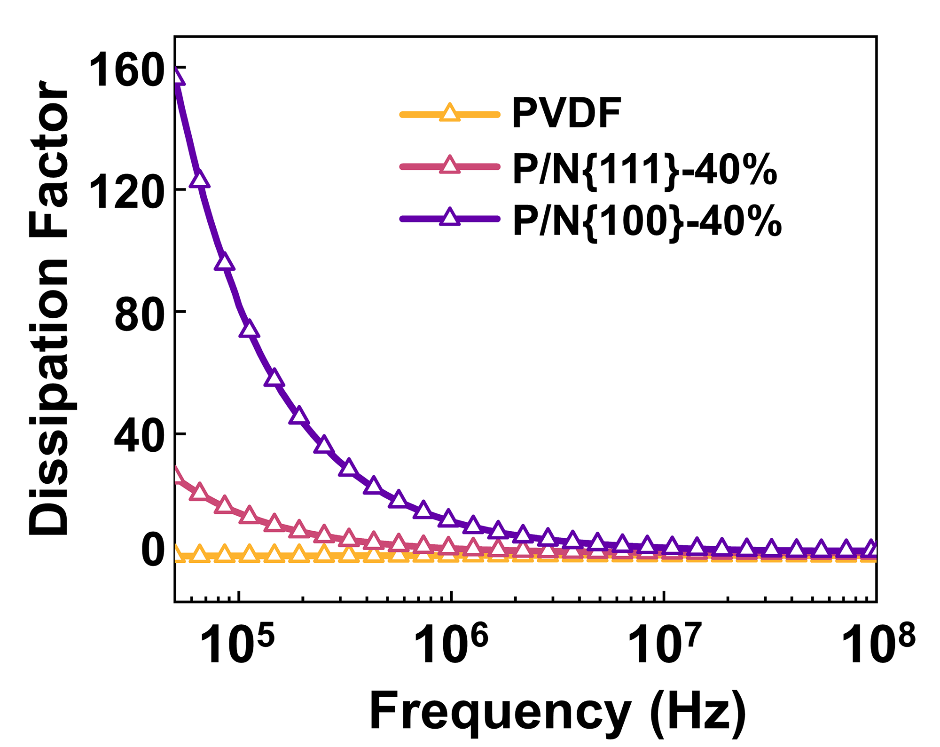


**Figure S15.** Dissipation factor of P/N-40% composites.


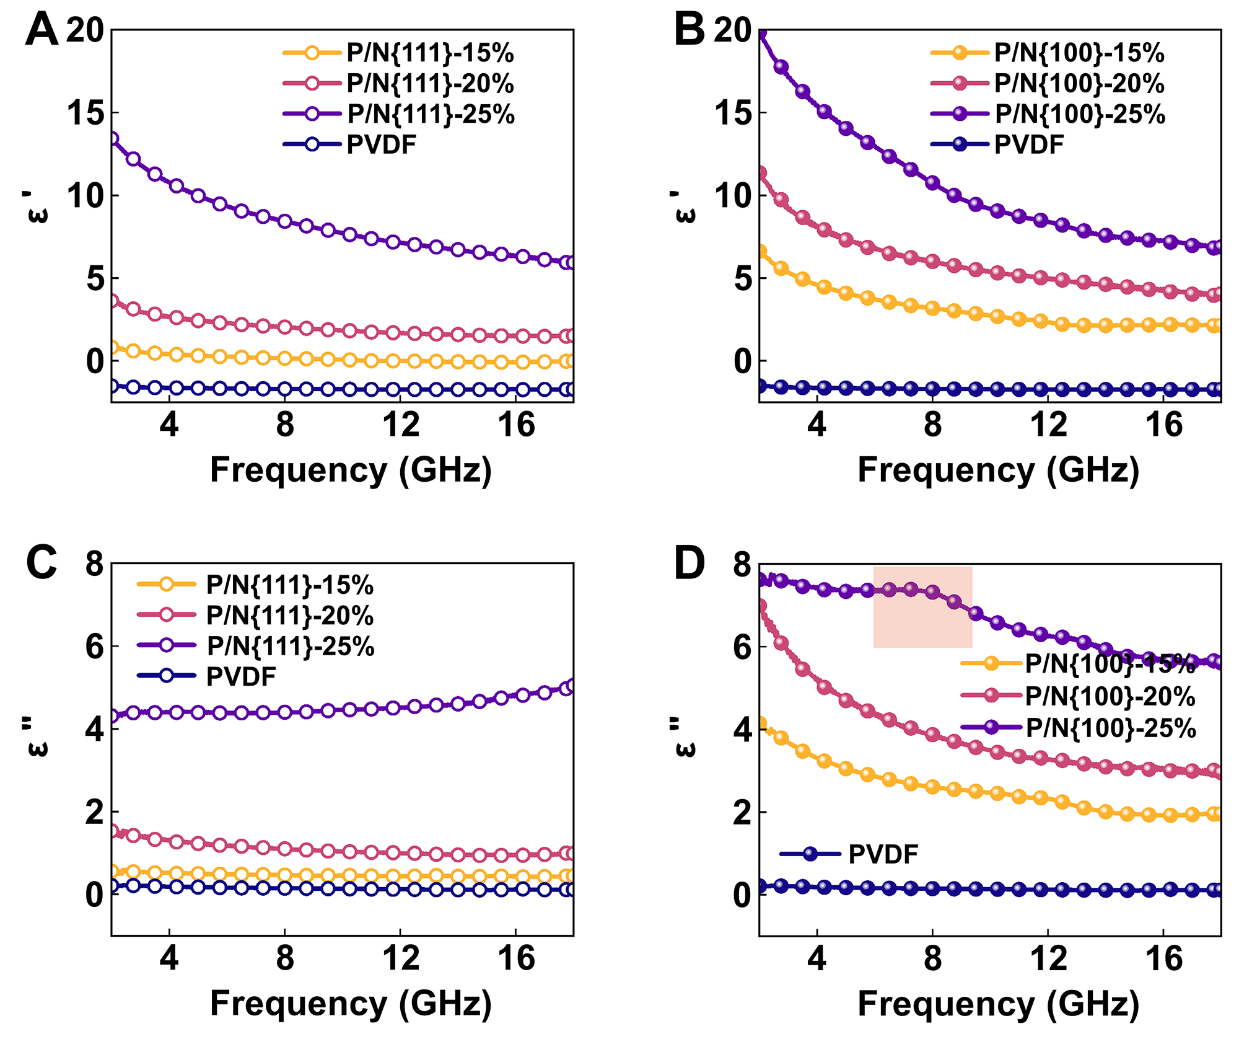


**Figure S16.** Real part of permittivity of **A,** P/N{111} and **B,** P/N{100} composites at EMWs from 2 GHz to 18 GHz. Imaginary part of permittivity of **C,** P/N{111} and **D,** P/N{100} composites at EMWs from 2 GHz to 18 GHz.


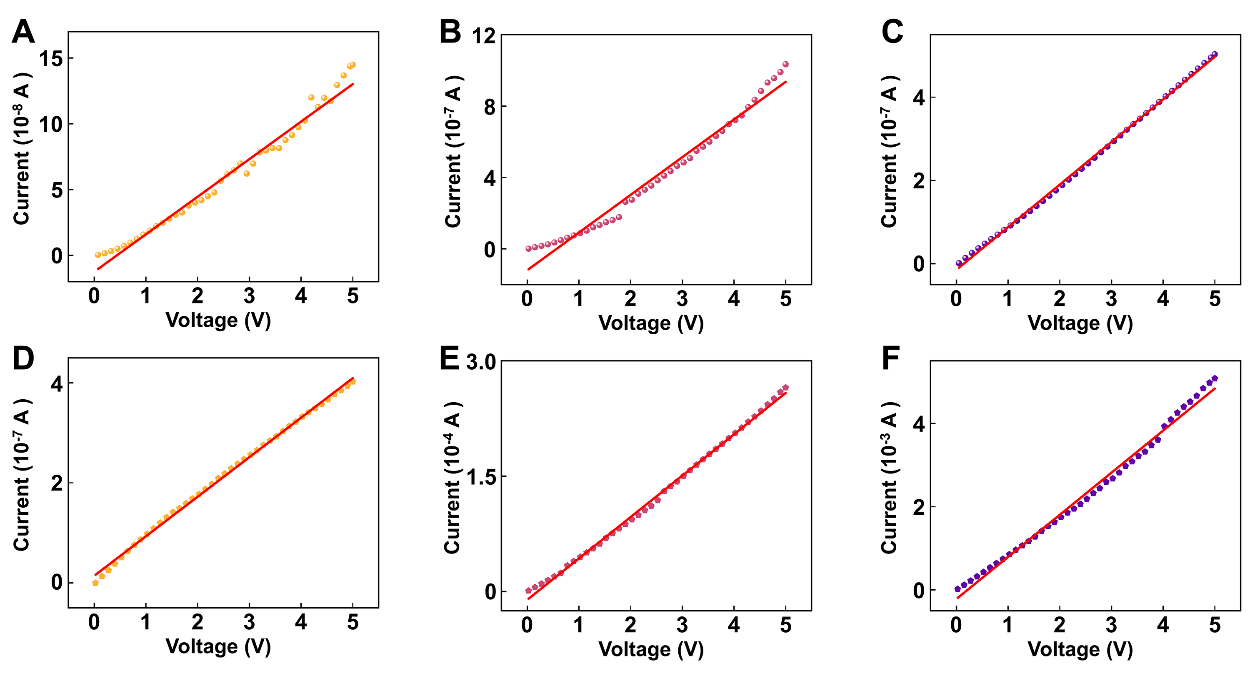


**Figure S17.** Current-voltage curve of **A**, P/N{111}-15%, **B**, P/N{111}-20%, **C**, P/N{111}-25%, **D**, P/N{100}-15%, **E,** P/N{100}-20% and **F,** P/N{100}-25%.

The conductivity can be calculated using the resistance of the material and the length and area of the test specimen, using the following equation56:

(23)

Where the , and are the length, resistance and area, respectively.

**Supplementary Table S1. The conductivity of P/N{111} and P/N{100} with different mass fraction (15 wt.%, 20 wt.%, 25 wt.%).**

|  | **P/N{111}** (S/m) | **P/N{100}** (S/m) |
| --- | --- | --- |
| **15 wt.%** | 5.92×10-7 | 1.70×10-7 |
| **20 wt.%** | 1.53×10-7 | 1.11×10-4 |
| **25 wt.%** | 1.14×10-7 | 1.26×10-3 |


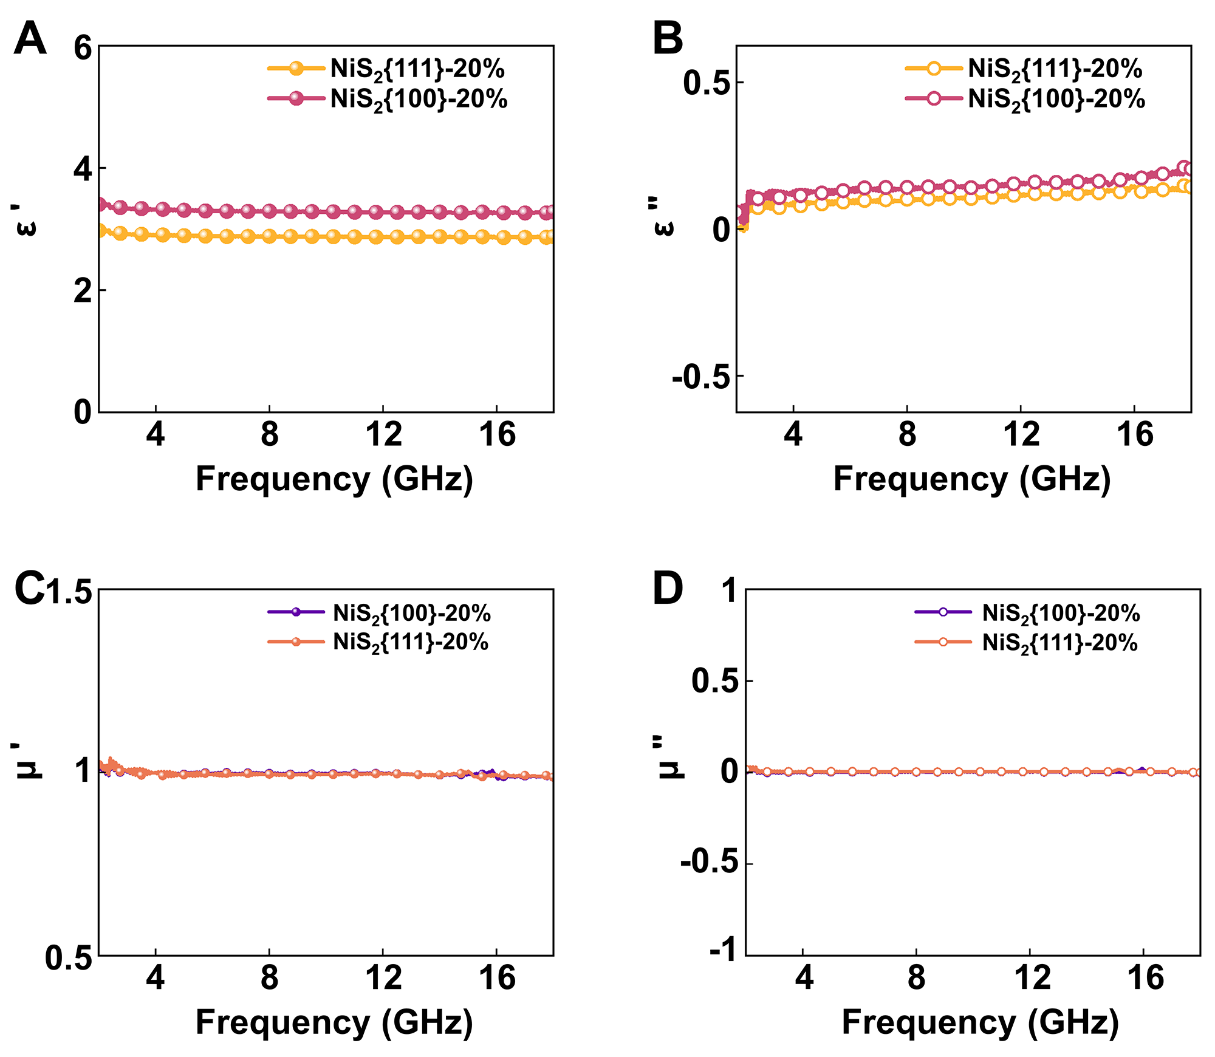


**Figure S18. A, B** Permittivity of NiS2/Paraffinic. **C, D** Permeability of NiS2/Paraffinic.


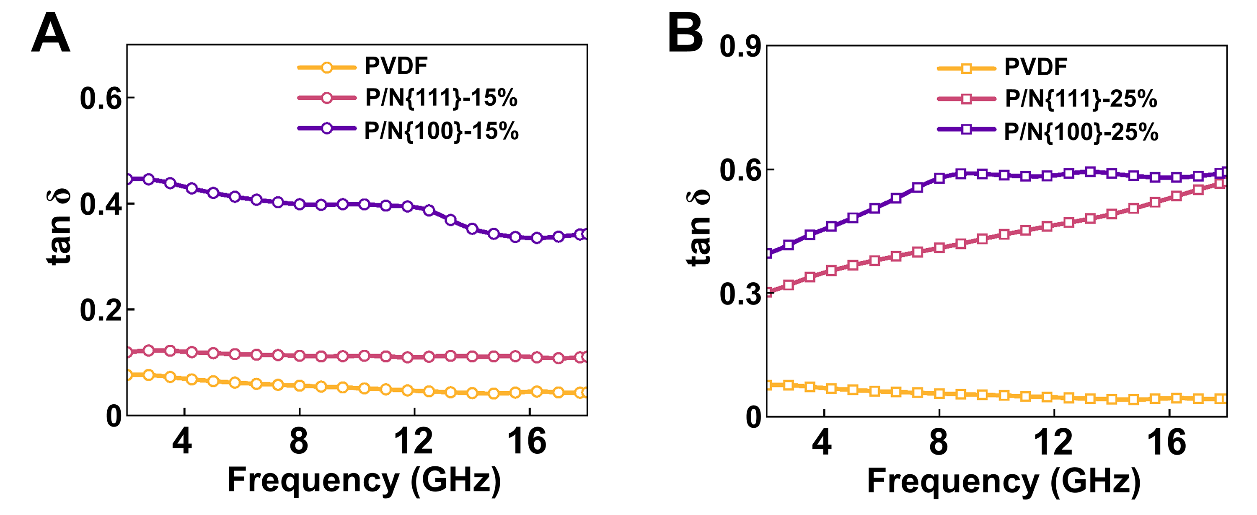


**Figure S19. A,** Dielectric loss tangent of PVDF and P/N-15% composites. **B,** Dielectric loss tangent of PVDF and P/N-25% composites.


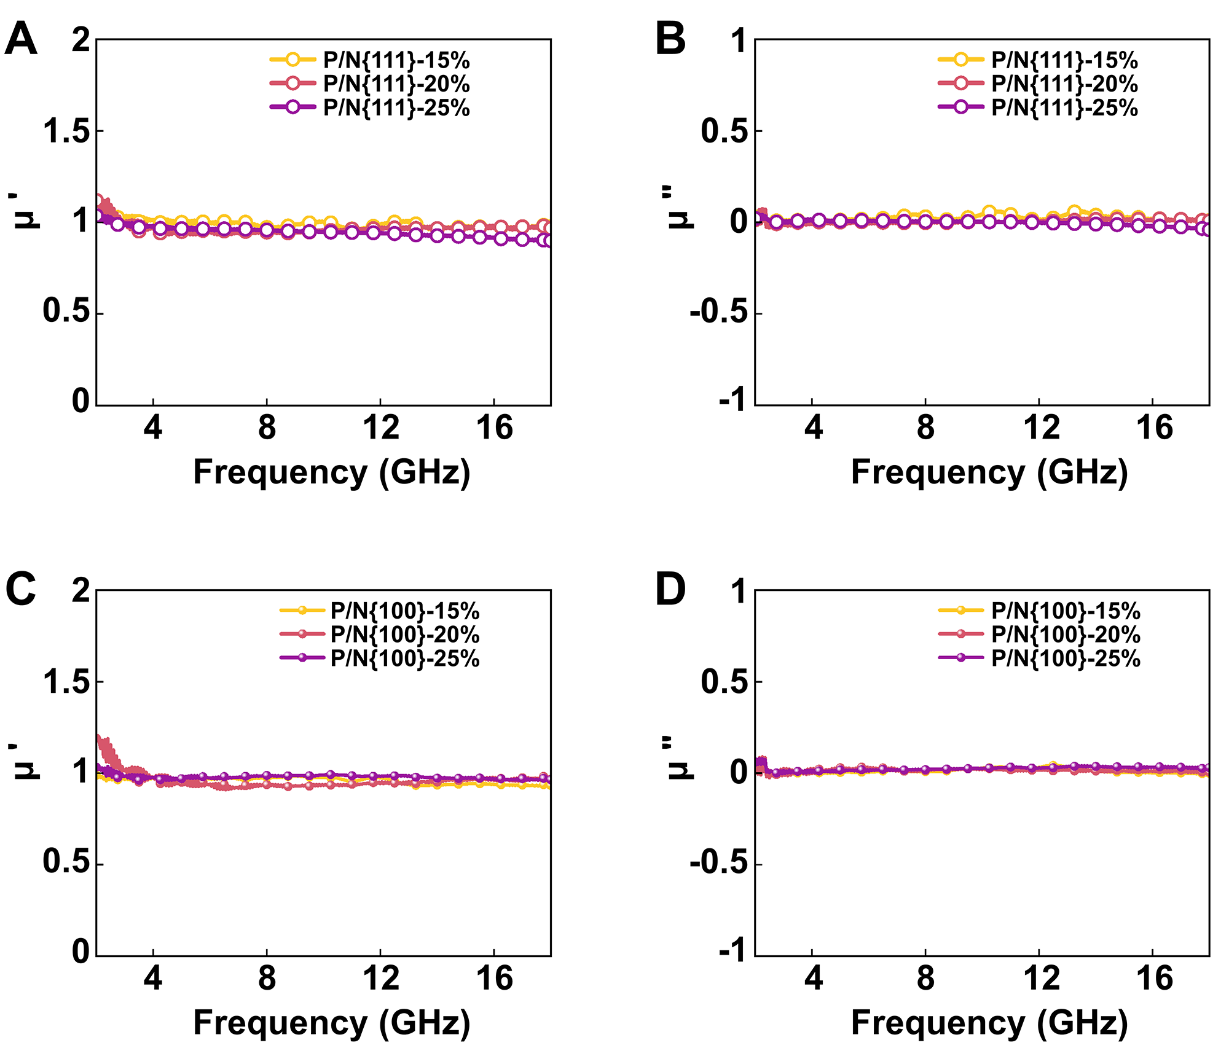


**Figure S20.** Permeability of **A, B** P/N{111} and **C, D** P/N{100}.


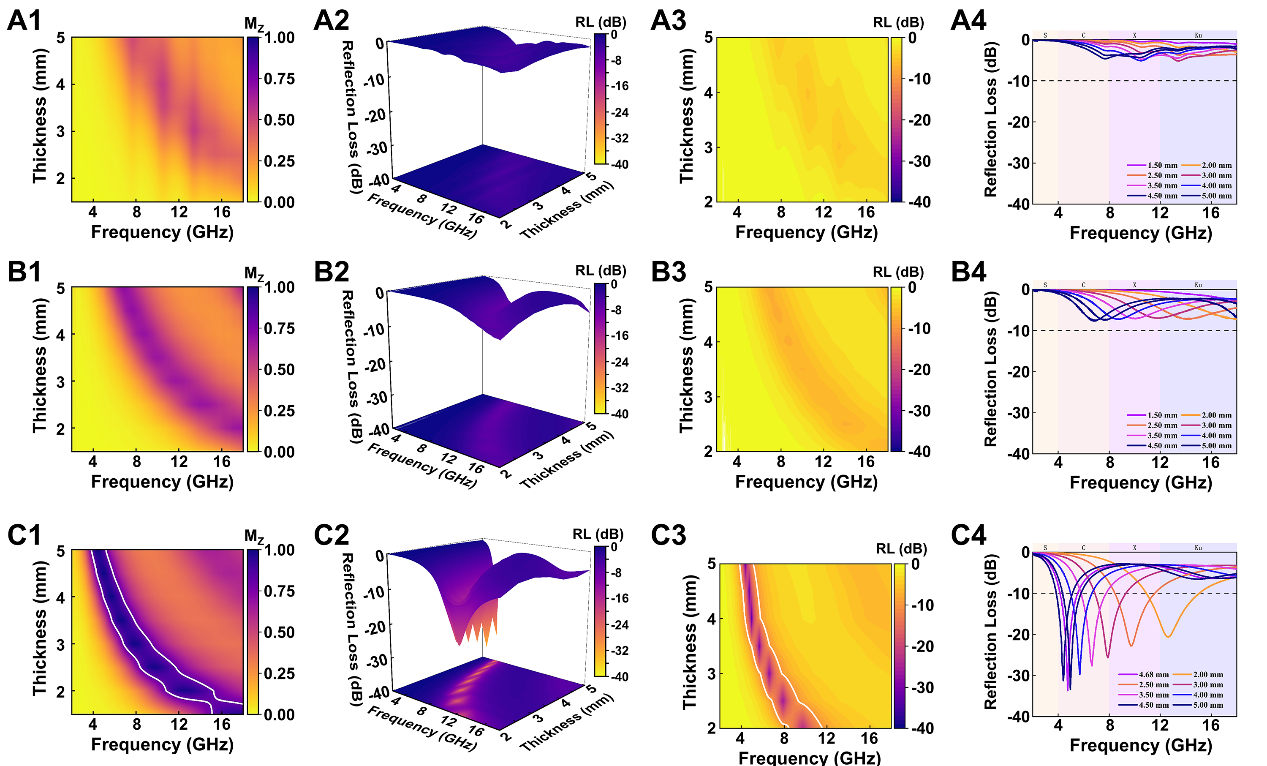


**Figure S21.** Impedance matching 2D color projection of **A1,** P/N{111}-15%, **B1,** P/N{111}-20%, **C1,** P/N{111}-25%.

The reflection loss of P/N{111}-15%, **A2**, 3D color mapping surface diagram, **A3**, 2D color projection, **A4**, 2D curves.

The reflection loss of P/N{111}-20%, **B2**, 3D color mapping surface diagram, **B3**, 2D color projection, **B4**, 2D curves.

The reflection loss of P/N{111}-25%, **C2**, 3D color mapping surface diagram, **C3**, 2D color projection, **C4**, 2D curves.


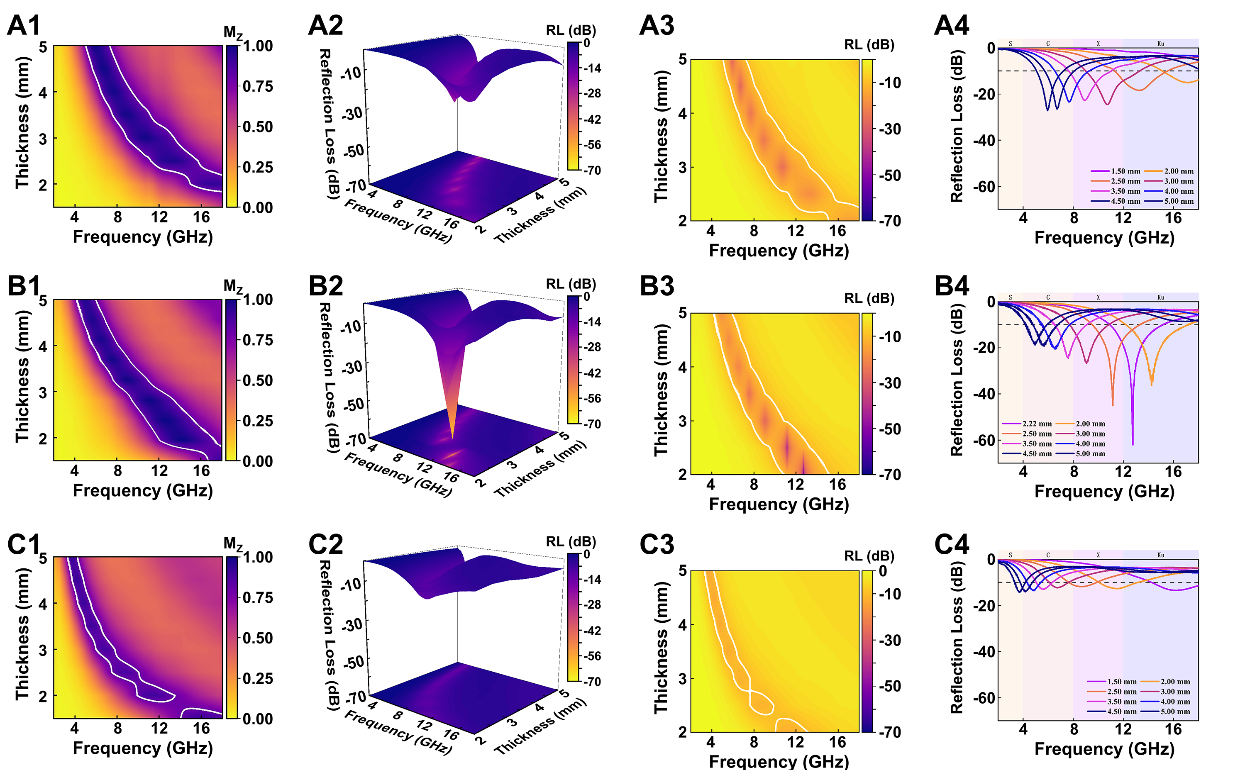


**Figure S22.** Impedance matching 2D color projection of **A1,** P/N{100}-15%, **B1,** P/N{100}-20%, **C1,** P/N{100}-25%.

The reflection loss of P/N{100}-15%, **A2**, 3D color mapping surface diagram, **A3**, 2D color projection, **A4**, 2D curves.

The reflection loss of P/N{100}-20%, **B2**, 3D color mapping surface diagram, **B3**, 2D color projection, **B4**, 2D curves.

The reflection loss of P/N{100}-25%, **C2**, 3D color mapping surface diagram, **C3**, 2D color projection, **C4**, 2D curves.


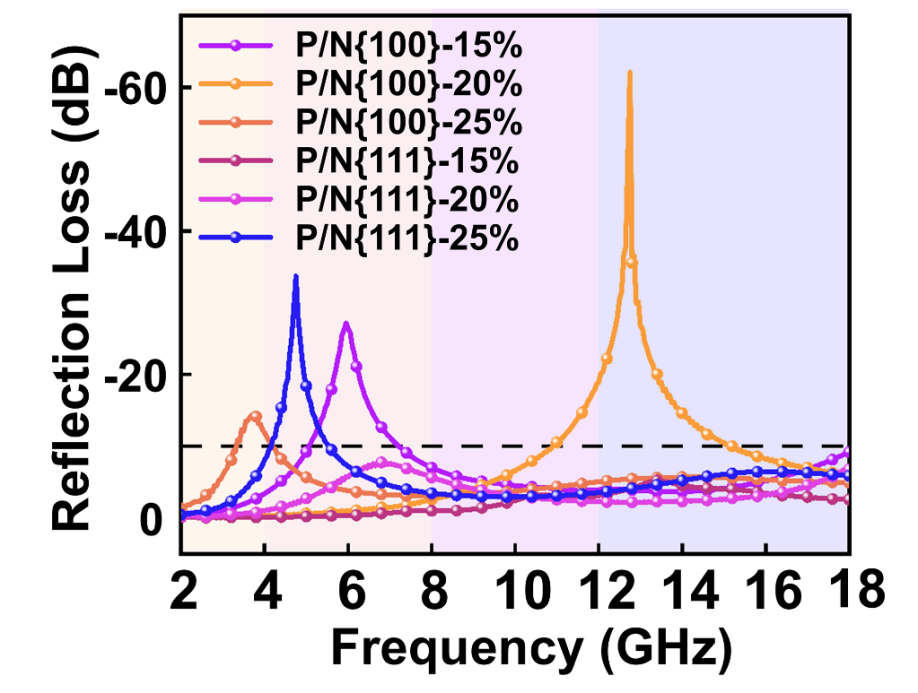


**Figure S23.** Minimum reflection loss of P/N composites.


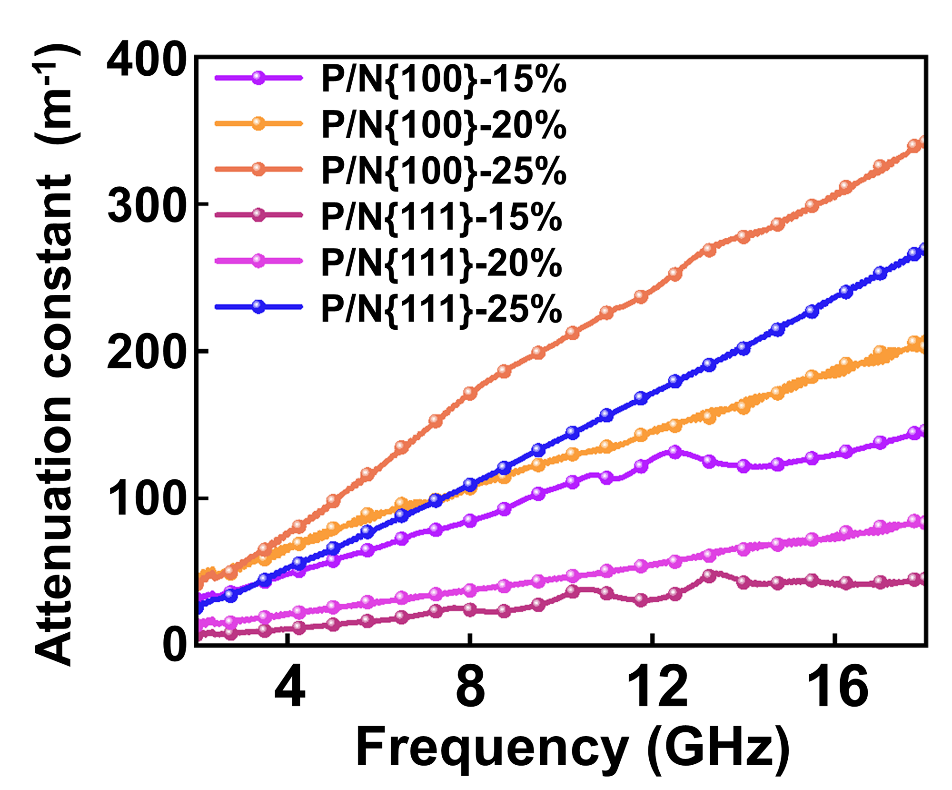


**Figure S24.** The attenuation constants of P/N composites.


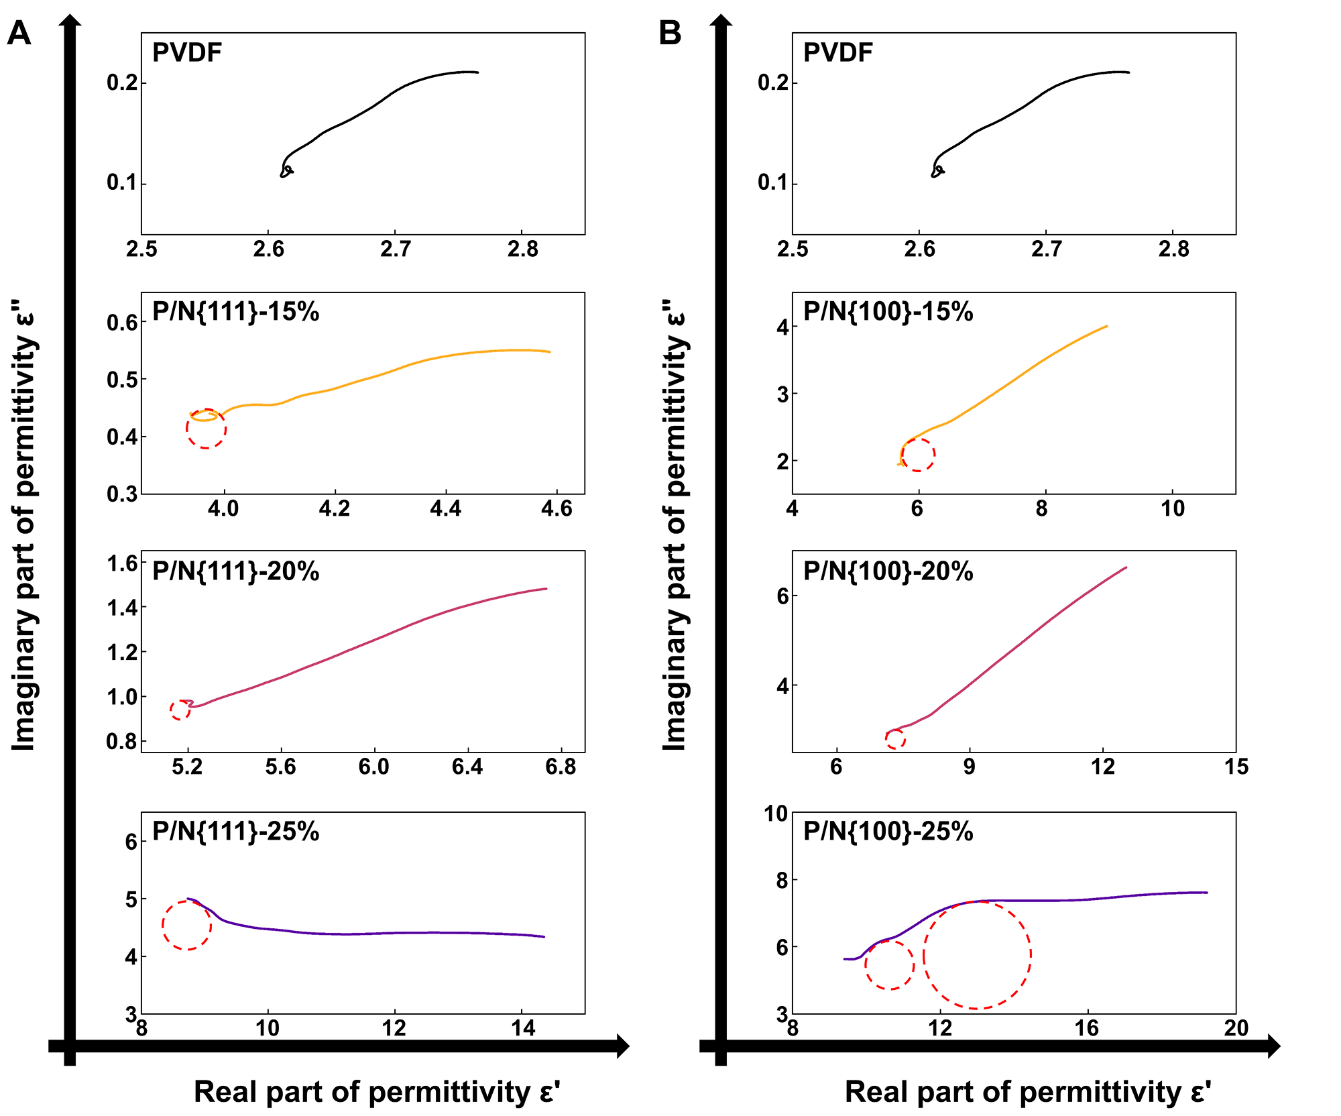


**Figure S25.** Cole-Cole curves of **A,** PVDF and P/N{100}, **B,** PVDF and P/N{100}.

The Cole-Cole plot (ε'-ε" curve) can be utilized to obtain the dielectric loss relationship of the samples. A semicircle on the curve represents a typical Debye relaxation process, called a Cole-Cole semicircle, which can be expressed as polarization loss. As shown in the following equation56:

(24)

where εs and ε∞ are the static permittivity as the frequency approaches 0 and the permittivity in the limit as frequency approaches infinity, respectively.


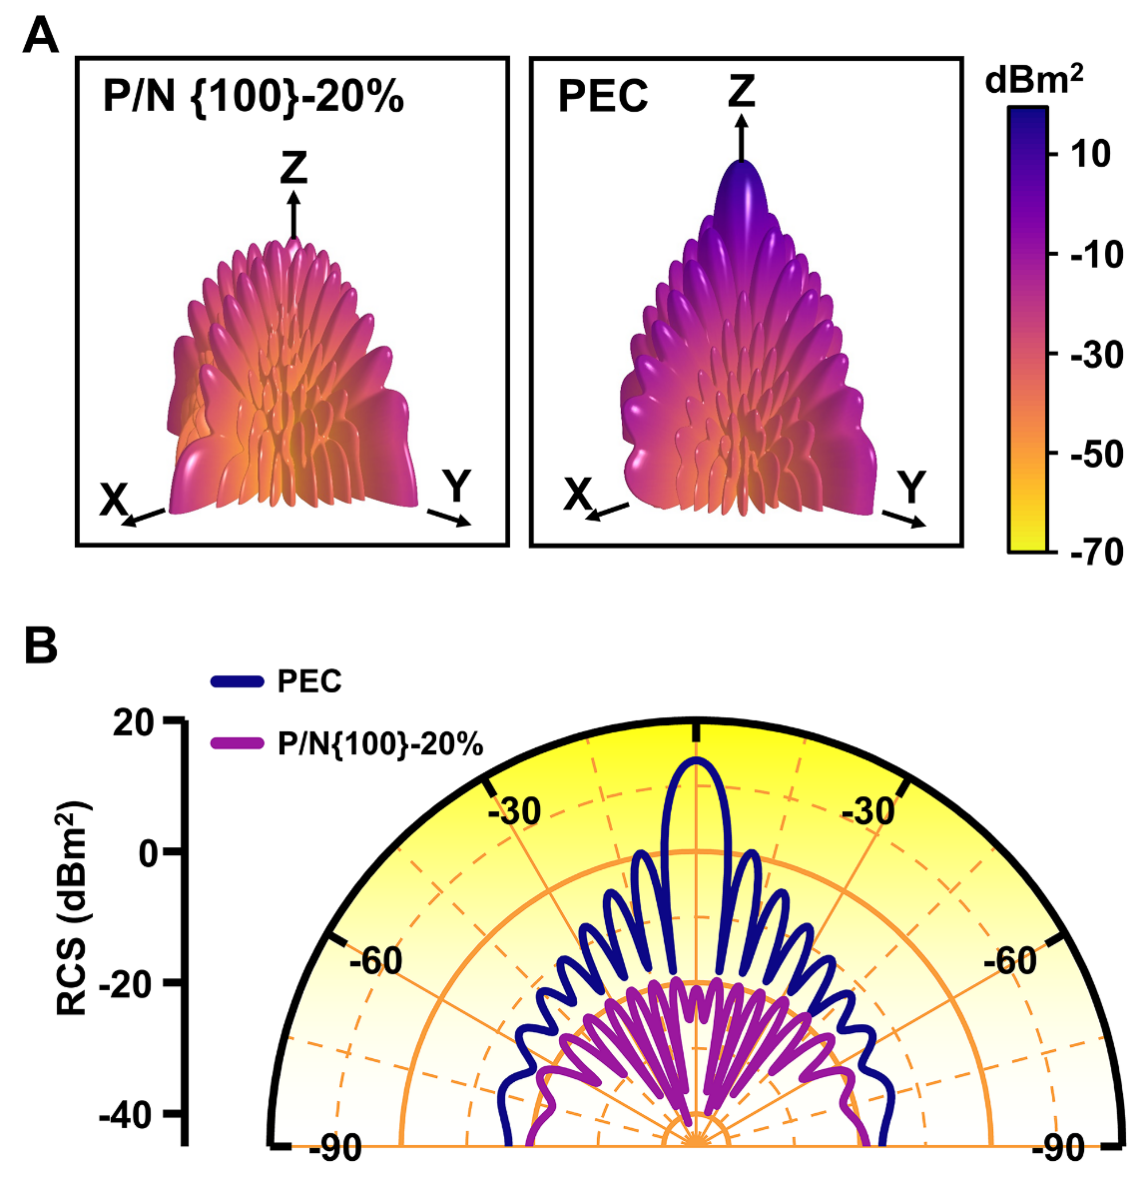


**Figure S26. A,** 3D RCS plot for the PEC substrate and covered with P/N{100}-20%. **B,** Analog RCS values in polar coordinates.

RCS is a fundamental concept in radar stealth technology, as it quantifies the effective area through which a target scatters radar waves back to the source, reflecting the object's capability to return radar signals. For a scattering source, its RCS value () can be expressed by the following equation56:

(25)

where is the area of the plate, is the length of the incident electromagnetic wave, and and are the electric field strengths of the emitted and received waves, correspondingly. The simulation model was constructed with a Perfect Electric Conductor (PEC) layer positioned at the bottom, and an absorbing layer composed of P/N{100}-20% with a thickness of 2.22 mm placed on top. The dimensions of the model were standardized to 180 mm in both length and width. The model was oriented on the xOy plane, where a linearly polarized plane electromagnetic wave was introduced, propagating from the positive Z-axis toward the negative Z-axis. The electric field polarization was oriented along the φ direction. Furthermore, the far-field monitor was set to a frequency of 12.75 GHz to evaluate the absorption characteristics.


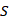

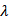

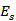

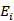


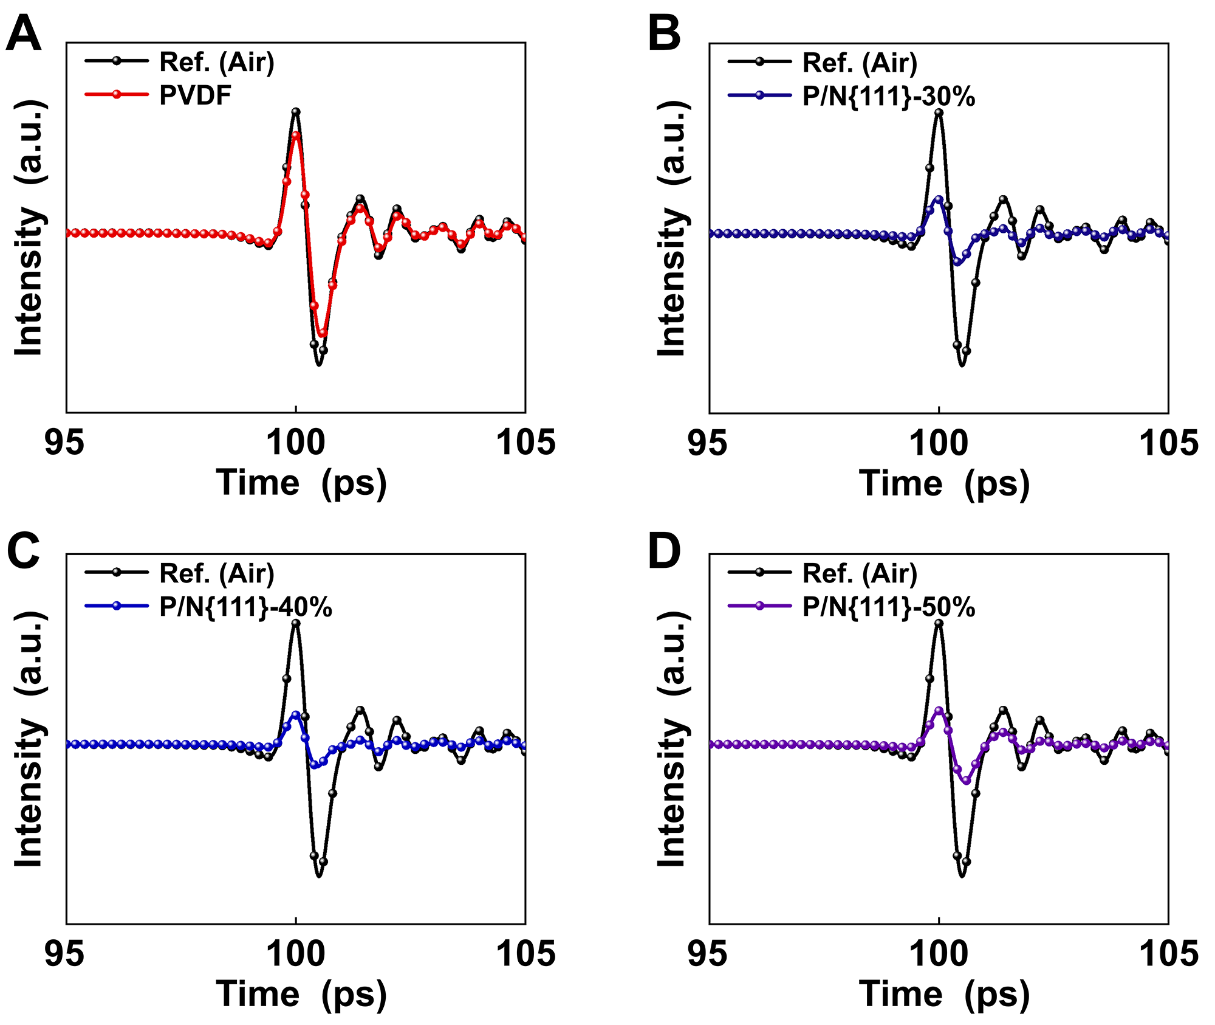


**Figure S27.** The THz time-domain spectroscopy of **A,** PVDF, **B,** P/N{111}-30%, **C**, P/N{111}-40%, **D**, P/N{111}-50% for transmission mode at 0.2-2.0 THz.


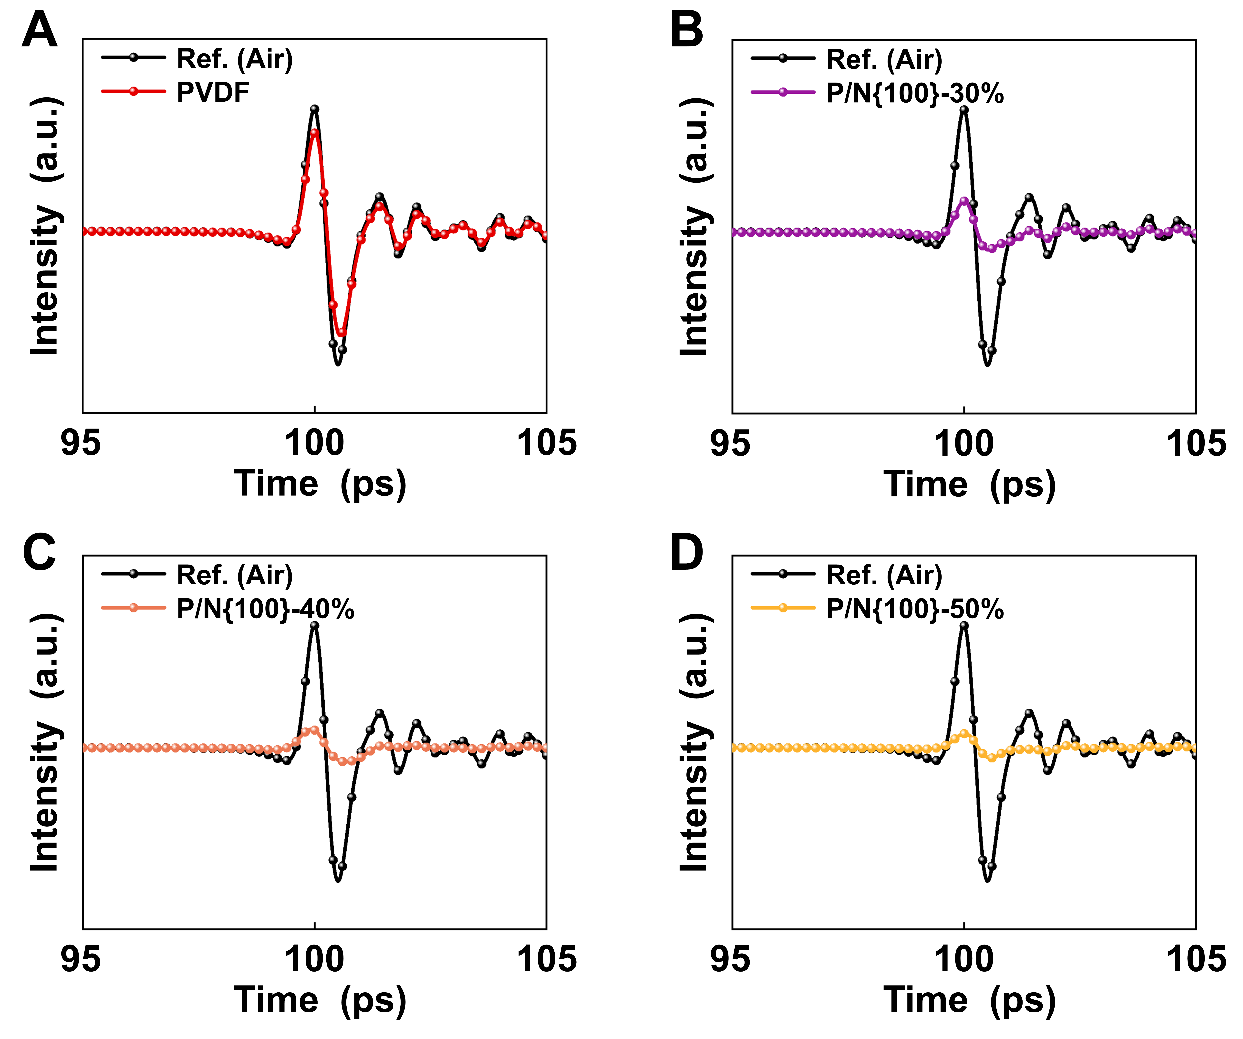


**Figure S28.** The THz time-domain spectroscopy of **A,** PVDF, **B,** P/N{100}-30%, **C**, P/N{100}-40%, **D**, P/N{100}-50% for transmission mode at 0.2-2.0 THz.


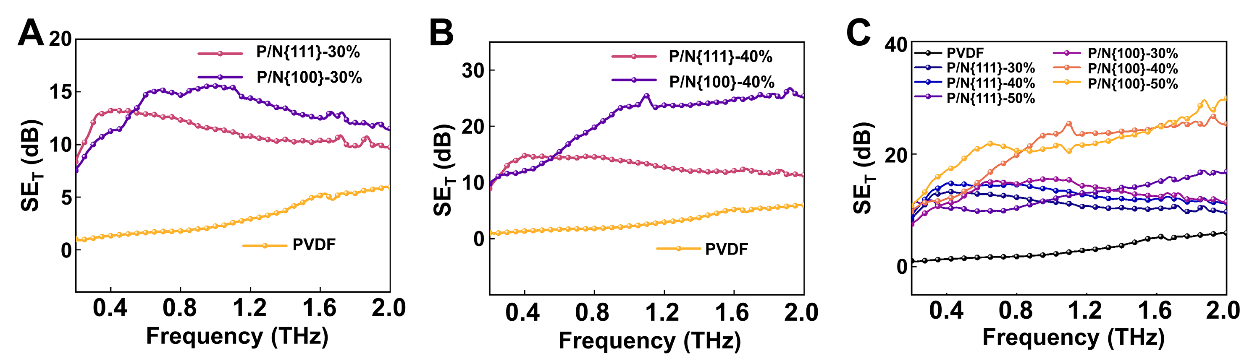


**Figure S29.** Total shielding performance (SET) curves of **A**, P/N-30% **B**, P/N-40% and **C**, all P/N composites at 0.2-2.0 THz.


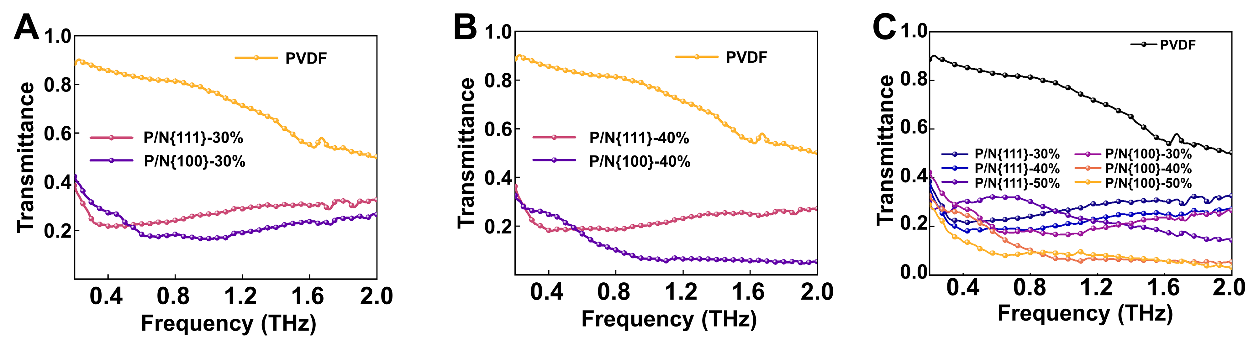


**Figure S30.** The transmission curves of **A**, P/N-30% **B**, P/N-40% and **C**, all P/N composites at 0.2-2.0 THz.


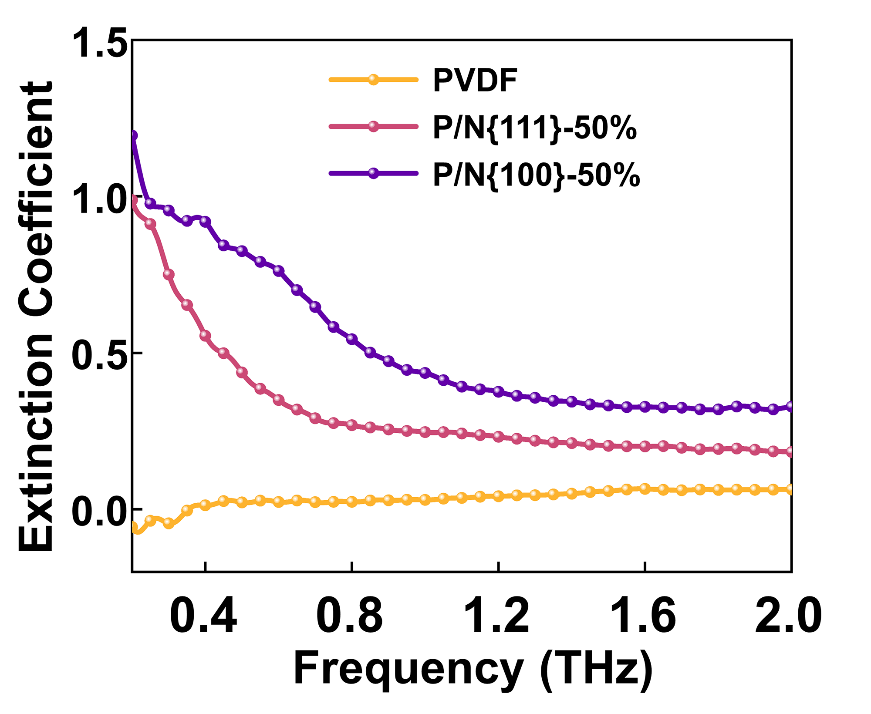


**Figure S31.** Theextinction coefficients of PVDF and P/N-50% composites at 0.2-2.0 THz.


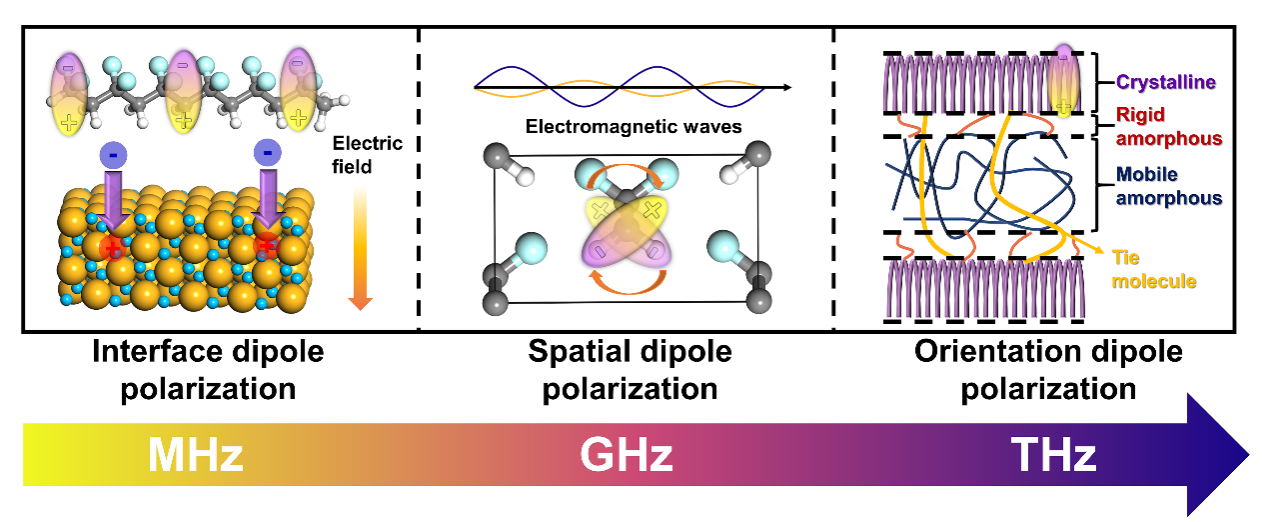


**Figure S32.** Schematic illustration of loss mechanisms in P/N composites across frequency bands.


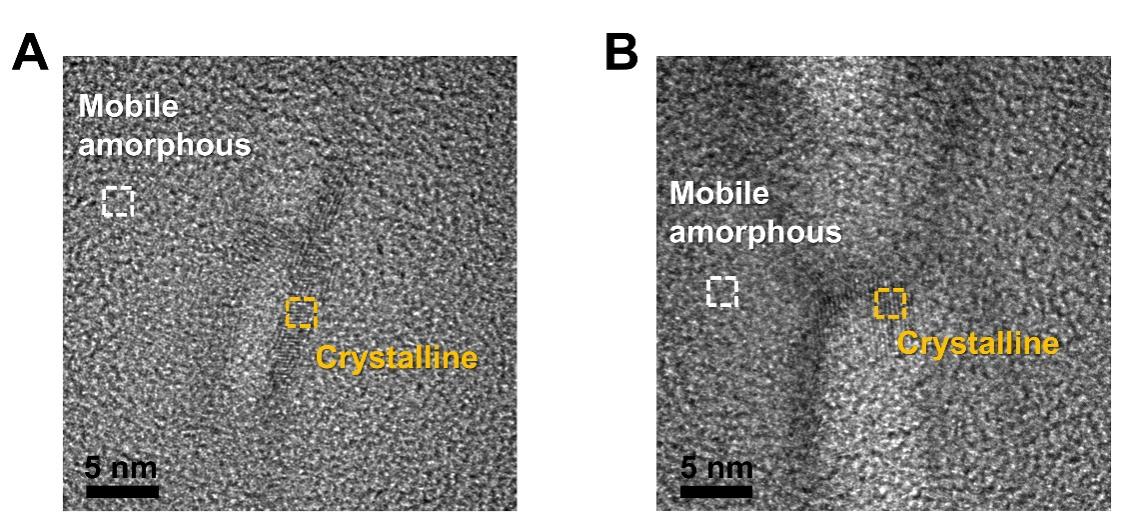


**Figure S33. A, B** TEM image of semi-crystalline PVDF.


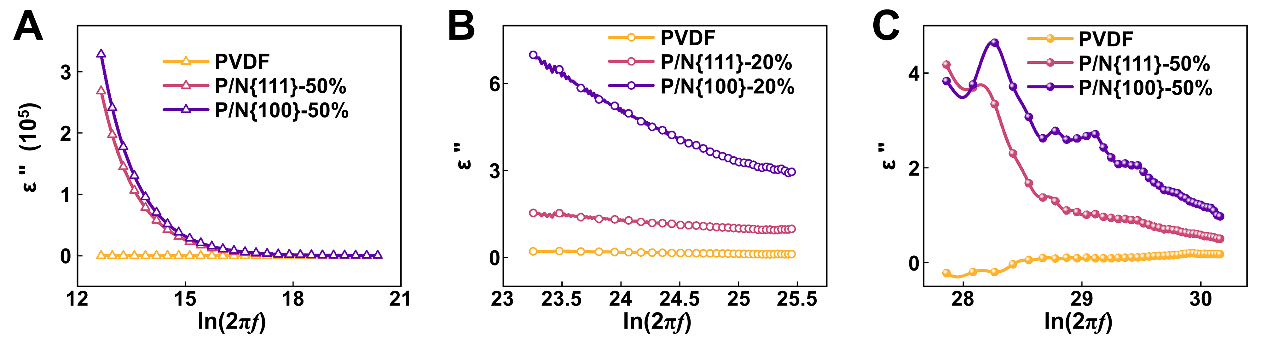


**Figure S34.** A plot of ε" versus ln(2πf) for the PVDF and P/N composites in the **A,** MHz, **B,** GHz, **C,** THz frequency range.

The Kramers-Kronig relations state that the real part and the imaginary part of the complex permittivity of a material are interrelated through the Hilbert transform:

(26)

(27)

This leads to a fundamental relationship that reveals an integral constraint between loss intensity and bandwidth.

(28)

where *P. V.* denotes the Cauchy principal value integral, is the dielectric constant at the high-frequency limit, and represents the static dielectric constant59, 60.

This implies that for linear passive systems, there exists a theoretical upper limit on the integral of loss intensity over bandwidth. Ferroelectric polymer PVDF exhibits pronounced changes in spontaneous polarization under alternating electromagnetic field excitation, owing to its inherent spontaneous polarization, resulting in a substantial dielectric constant difference (). This property effectively enhances the average loss intensity of the material, maintaining strong dielectric response even at high frequencies. Furthermore, the P/N organic ferroelectric composite exhibits a broad distribution of relaxation times, which enables the activation of multiple polarization mechanisms across different frequency bands. As a result, multiple distinct peaks emerge in the frequency-dependent imaginary permittivity . This multi-relaxation behavior results in pronounced nonlinear dielectric characteristics, overcomes the classical Kramers–Kronig relations applicable to linear passive systems, and ultimately enables highly efficient electromagnetic energy dissipation simultaneously across multiple frequency bands.


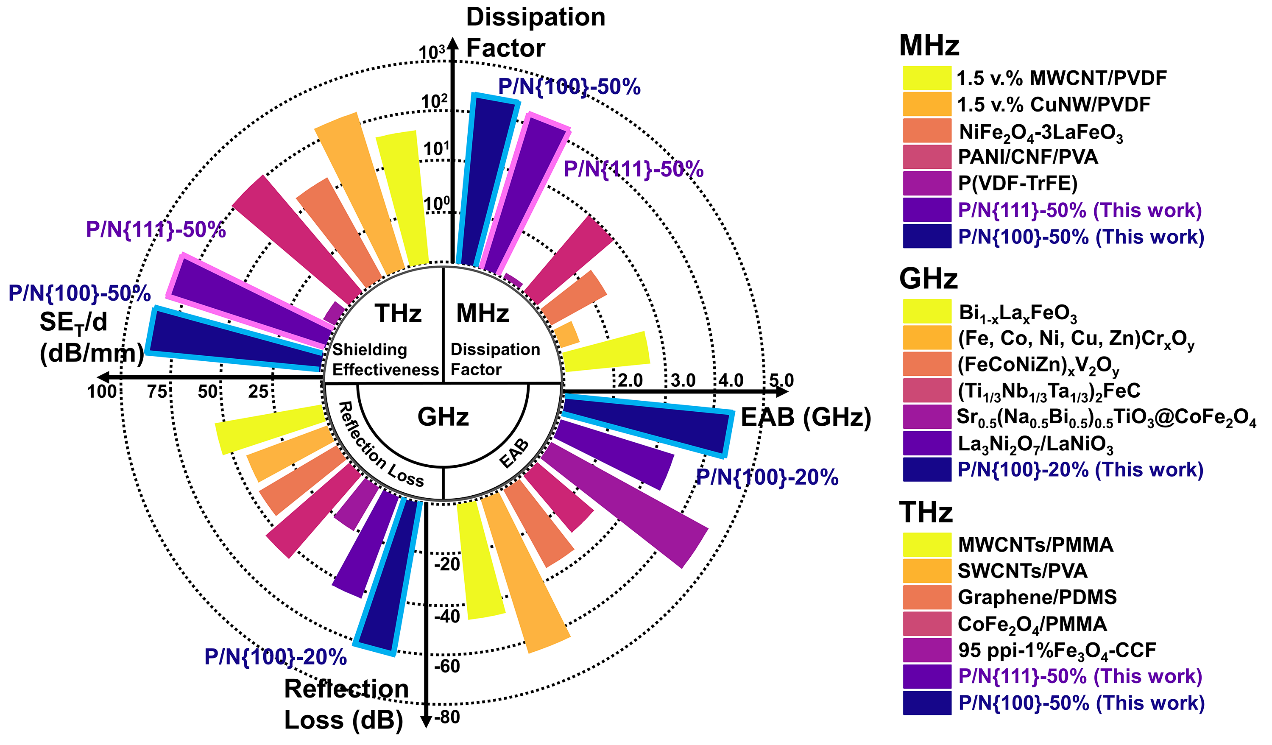


**Figure S35.** Comparative performance of P/N composites and other ferroelectric composites in EM loss across frequency bands.

**Supplementary Table S2. Comparative performance of P/N composites and other ferroelectric composites in electromagnetic wave loss across frequency bands.**

| **MHz** | | |
| --- | --- | --- |
| **Composite** | **Dissipation**  **Factor (1 MHz)** | **Ref.** |
| 1.5 v.% MWCNT/PVDF | 5 | 40 |
| 1.5 v.% CuNW/PVDF | 0.25 | 40 |
| NiFe2O4-3LaFeO3 | 1.9 | 41 |
| PANI/CNF/PVA | 10 | 42 |
| P(VDF-TrFE) | 0.13 | 37 |
| P/N{111}-50% | 166.35 | **This work** |
| P/N{111}-50% | 238.82 | **This work** |
| **GHz** | | |
| **Composite** | **EAB (GHz)** | **Ref.** |
| Bi1-xLaxFeO3 | 3.3 | 43 |
| (Fe, Co, Ni, Cu, Zn)CrxOy | 4.2 | 44 |
| (FeCoNiZn)xV2Oy | 2.77 | 45 |
| (Ti1/3Nb1/3Ta1/3)2FeC | 2.48 | 46 |
| Sr0.5(Na0.5Bi0.5)0.5TiO3@CoFe2O4 | 4.56 | 47 |
| La3Ni2O7/LaNiO3 | 3.36 | 48 |
| P/N{100}-20% | 4.35 | **This work** |
| **GHz** | | |
| **Composite** | **Reflection Loss (RL)** | **Ref.** |
| Bi1-xLaxFeO3 | -43.40 | 43 |
| (Fe, Co, Ni, Cu, Zn)CrxOy | -34.60 | 44 |
| (FeCoNiZn)xV2Oy | -36.20 | 45 |
| (Ti1/3Nb1/3Ta1/3)2FeC | -44.40 | 46 |
| Sr0.5(Na0.5Bi0.5)0.5TiO3@CoFe2O4 | -20.19 | 47 |
| La3Ni2O7/LaNiO3 | -43.30 | 48 |
| P/N{100}-20% | -62.08 | **This work** |
| **THz** | | |
| **Composite** | **Shielding Effectiveness**  **SET/d (dB/mm)** | **Ref.** |
| MWCNTs/PMMA | 66.67 | 49 |
| SWCNTs/PVA | 81.60 | 50 |
| Graphene/PDMS | 57.14 | 51 |
| CoFe2O4/PMMA | 76.66 | 52 |
| 95 ppi-1%Fe3O4-CCF | 6.66 | 53 |
| P/N{111}-50% | 83.32 | **This work** |
| P/N{111}-50% | 87.63 | **This work** |

References

1. Qian, X. *et al.* Fluoropolymer ferroelectrics: Multifunctional platform for polar-structured energy conversion. *Science* **380**, eadg0902 (2023).

2. Chen, X. *et al.* Relaxor ferroelectric polymer exhibits ultrahigh electromechanical coupling at low electric field. *Science* **375**, 1418-1422 (2022).

3. Kirkwood, J. G. & Fuoss, R. M. Anomalous Dispersion and Dielectric Loss in Polar Polymers. *The Journal of Chemical Physics* **9**, 329-340 (1941).

4. Hui, S. *et al.* Highly Mixed Index Facet Engineering Induces Defect Formation and Converts the Wave‐Transmissive Mott Insulator NiO into Electromagnetic Wave Absorbent. *Advanced Materials* **37**, 2415844 (2025).

5. Xiong, X. *et al.* Atomic‐Level Electric Polarization in Entropy‐Driven Perovskites for Boosting Dielectric Response. *Advanced Materials* **37**, 2415351 (2025).

6. Tang, Z. *et al.* Synthesis of CuCo2S4@Expanded Graphite with crystal/amorphous heterointerface and defects for electromagnetic wave absorption. *Nature Communications* **14**, 5951 (2023).

7. Wang, Z. Liao, W.-Q. Giant electromechanical effects in polymers. *Science* **375**, 1353-1354 (2022).

8. Yuan, X. *et al.* A poling-free PVDF nanocomposite via mechanically directional stress field for self-powered pressure sensor application. *Nano Energy* **98**, 107340 (2022).

9. Fan, W. *et al.* Sweat permeable and ultrahigh strength 3D PVDF piezoelectric nanoyarn fabric strain sensor. *Nature Communications* **15**, 3509 (2024).

10. Tian, J. *et al.* Anionic high-entropy doping engineering for electromagnetic wave absorption. *Nature Communications* **16**, 3163 (2025).

11. Liu, M. *et al.* Entropy-modulated atomic ripple texturing in two-dimensional transition metal carbonitrides. *Nature Communications* **16**, 5633 (2025).

12. Qu, N. *et al.* 2D/2D coupled MOF/Fe composite metamaterials enable robust ultra–broadband microwave absorption. *Nature Communications* **15**, 5642 (2024)

13. Liu, Y. *et al.* Electro-thermal actuation in percolative ferroelectric polymer nanocomposites. *Nature Materials* **22**, 873-879 (2023).

14. Kawai, H. The Piezoelectricity of Poly (vinylidene Fluoride). *Japanese Journal of Applied Physics* **8**, 975 (1969).

15. Davis, G. T., McKinney, J. E., Broadhurst, M. G. & Roth, S. C. Electric-field-induced phase changes in poly(vinylidene fluoride). *Journal of Applied Physics* **49**, 4998–5002 (1978).

16. Luo, S. *et al.* Stabilizing NiS2 on Conductive Component via Electrostatic Self‐assembly and Covalent Bond Strategy for Promoting Sodium Storage. *Advanced Functional Materials* **34**, 2403166 (2024).

17. Zhang, N. *et al.* Surface Activation and Ni‐S Stabilization in NiO/NiS2 for Efficient Oxygen Evolution Reaction. *Angewandte Chemie International Edition* **134**, e202207217 (2022).

18. Liang, Y. *et al.* Crystal plane dependent electrocatalytic performance of NiS2 nanocrystals for hydrogen evolution reaction. *Journal of Catalysis* **381**, 63-69 (2020).

19. Yu, J., Jiang, P., Wu, C., Wang, L. & Wu, X. Graphene nanocomposites based on poly(vinylidene fluoride): Structure and properties. *Polymer Composites* **32**, 1483-1491 (2011).

20. Cai, X., Lei, T., Sun, D. & Lin, L. A critical analysis of the α, β and γ phases in poly(vinylidene fluoride) using FTIR. *RSC Advances* **7**, 15382-15389 (2017).

21. Martins, P., Lopes, A. C. & Lanceros-Mendez, S. Electroactive phases of poly(vinylidene fluoride): Determination, processing and applications. *Progress in Polymer Science* **39**, 683-706 (2014).

22. Nalwa, H. S. *Ferroelectric Polymers* (Dekker, 1995).

23. Gutiérrez-Fernández, E. *et al.* Development of polar phases in ferroelectric poly(vinylidene fluoride) (PVDF) nanoparticles. *Polymer* **264**, 125540 (2023).

24. Li, C. *et al.* Strain‐Induced Polar Interfaces in Ferroelectric Polymer Nanocomposites. *Advanced Functional Materials* 2421825 (2025) doi:10.1002/adfm.202421825.

25. Debye, P. J. William. *Polar molecules.* (Dover publications, 1929).

26. Cheng, S. *et al.* Carbon nanolayer-mounted single metal sites enable dipole polarization loss under electromagnetic field. *Nature Communications* **15**, 9077 (2024).

27. Hao, B. *et al.* Multiscale Design of Dielectric Composites for Enhanced Microwave Absorption Performance at Elevated Temperatures. *Advanced Functional Materials* **35**, 2423897 (2025).

28. Gou, J.-L. *et al.* Chang. Solid solution strategy modulated defects engineering of (Cr1-xVx)2AlC MAX phase toward superior electromagnetic wave absorption. *Rare Metals* **43**, 3205–3219 (2024).

29. Cai, B. *et al.* Interface-induced dual-pinning mechanism enhances low-frequency electromagnetic wave loss. *Nature Communications* **15**, 3299 (2024).

30. Peng, H. *et al.* Radar‐Terahertz‐Infrared Compatible Stealth Coaxial Silver Nanowire@Carbon Nano‐Cable Aerogel. *Angewandte Chemie International Edition* **64**, e202421090 (2025).

31. Wu, P. *et al.* Pseudo-binary composite of Sr2TiMoO6-Al2O3 as a novel microwave absorbing material. *Rare Metals* **44**, 503–514 (2025).

32. Wang, H. *et al.* Bioinspired Disordered Aerogel for Omnidirectional Terahertz Response. *Advanced Materials* **37**, 2418889 (2025).

33. Zhao, T. *et al.* Ultrathin MXene assemblies approach the intrinsic absorption limit in the 0.5-10 THz band. *Nature Photonics* **17**, 622-628 (2023).

34. Xie, W. *et al.* Organohydrogel-based transparent terahertz absorber via ionic conduction loss. *Nature Communications* **15**, 38 (2024).

35. Hussain, K. *et al.* Terahertz time-domain spectroscopy of thin and flexible CNT-modified MXene/polymer composites. *Applied Physics A* **127**, 382 (2021).

36. Milton, G. W., Eyre, D. J. & Mantese, J. V., Finite Frequency Range Kramers-Kronig Relations: Bounds on the Dispersion. *Physical Review Letters* **79**, 3062-3065 (1997).

37. Tian, G. *et al.* Insight into Interfacial Polarization for Enhancing Piezoelectricity in Ferroelectric Nanocomposites. *Small* **19**, 2207947 (2023).

38. Zhang, S. *et al.* New Prospects in Built‐In Electric Fields for Electromagnetic Wave Absorption: from Fundamentals to Interdisciplinary Applications. *Advanced Functional Materials* e13762 (2025) doi:10.1002/adfm.202513762.

39. Wietzke, S. *et al.* Terahertz spectroscopy on polymers: A review of morphological studies. *Journal of Molecular Structure* **1006**, 41-51 (2011).

40. Da Silva, A. B., Arjmand, M., Sundararaj, U. & Bretas, R. E. S. Novel composites of copper nanowire/PVDF with superior dielectric properties. *Polymer* **55**, 226-234 (2014).

41. Jesica Anjeline, C., Mali, D. P. & Lakshminarasimhan, N. High dielectric constant of NiFe2O4-LaFeO3 nanocomposite: Interfacial conduction and dielectric loss. *Ceramics International* **47**, 34278-34288 (2021).

42. Anju, V. P. & Narayanankutty, S. K. High dielectric constant polymer nanocomposite for embedded capacitor applications. *Materials Science and Engineering: B* **249**, 114418 (2019).

43. Li, Y. *et al.* High‐Performance Ferroelectric Electromagnetic Attenuation Materials with Multiple Polar Units Based on Nanodomain Engineering. *Small* **18**, 2106302 (2022).

44. Yan, Z. *et al.* Dual-phase high-entropy (FeCoNiZn)xV2Oy oxides with promising microwave absorption properties. *Ceramics International* **48**, 36871-36879 (2022).

45. Li, L. *et al.* High Entropy Ceramics for Electromagnetic Functional Materials. *Advanced Functional Materials* **35**, 2416673 (2025).

46. Chen, L. *et al.* Multiprincipal Element M2FeC (M=Ti, V, Nb, Ta, Zr) MAX Phases with Synergistic Effect of Dielectric and Magnetic Loss. *Advanced Science* **10**, 2206877 (2023).

47. Gorai, A., Dutta, A. & Mandal, K. Enhancement of Microwave Absorption Properties of Crystal‐Engineered Perovskite Oxide Using Cobalt Ferrite. *Advanced Engineering Materials* **26**, 2401173 (2024).

48. Gao, Z. et al. Simultaneous enhancement of recoverable energy density and efficiency of lead-free relaxor-ferroelectric BNT-based ceramics. *Chemical Engineering Journal* **402**, 125951 (2020).

49. Macutkevic, J. et al. Multi-walled carbon nanotubes/PMMA composites for THz applications. *Diamond and Related Materials* **25**, 13-18 (2012).

50. Iftikhar, M. et al. Synergistic terahertz shielding effects of electrically conductive MXene and shape-controlled magnetic nickel in polyvinylidene fluoride (PVDF) composites. *Journal of Alloys and Compounds* **989**, 174306 (2024).

51. Zeranska‐Chudek, K., Lapinska, A., Siemion, A., Jastrzębska, A. M. & Zdrojek, M. Terahertz time domain spectroscopy of graphene and MXene polymer composites. *Journal of Applied Polymer Science* **138**, 49962 (2021).

52. Mohamed, F., Ahmad, M. M. & Hameed, T. A. Greener synthesis of lightweight, self‐standing PMMA/CoFe2O4 polymeric film for magnetic, electronic, and terahertz shielding applications. *Polymers for Advanced Technologies* **34**, 1497-1514 (2023).

53. Wei, D. et al. Flexible Terahertz Broadband Absorber Based on a Copper Composite Film. *ACS Applied Materials Interfaces* **16**, 54731-54741 (2024).

54. Chen, G. et al. Visualizing Nanoscale Interlayer Magnetic Interactions and Unconventional Low‐Frequency Behaviors in Ferromagnetic Multishelled Structures. *Advanced Materials* **36**, 2313411 (2024).

55. Liu, P. et al. Optimizing Integrated‐Loss Capacities via Asymmetric Electronic Environments for Highly Efficient Electromagnetic Wave Absorption. *Small* **20**, 2403903 (2024).

56. Zhang, Y. et al*.* Phosphorus Vacancy‐Induced Built‐In Electric Field for Electromagnetic Properties Modulation. *Advanced Science* e02857 (2025) doi:10.1002/advs.202502857.

57. Shan, B., Wang, Y., Ji, X. & Huang, Y. Enhancing Low-Frequency Microwave Absorption Through Structural Polarization Modulation of MXenes. *Nano-Micro Letters* **16**, 212 (2024).

58. Li, G. et al. Trans‐Electromagnetic and Optical, Multi‐Spectrum Compatible Defense of Ti3C2Tx/RGO/ZIF‐67(Co) Composite Aerogel. *Advanced Functional Materials* 2423269 (2025) doi:10.1002/adfm.202423269.

59. Haakestad, M. W. & Skaar, J. Causality and Kramers-Kronig relations for waveguides, *Optics Express* **13**, 9922-9934 (2005).

60. Horsley, S., Artoni, M. & La Rocca, G. Spatial Kramers–Kronig relations and the reflection of waves. *Nature Photonics* **9**, 436-439 (2015).
